# Supplementary material for: The Presence of Methylation Quantitative Trait Loci Indicates a Direct Genetic Influence on the Level of DNA Methylation in Adipose Tissue
Source: PLoS One. 2013 Feb 19;8(2):e55923. doi: 10.1371/journal.pone.0055923 (PMC3576415; doi:10.1371/journal.pone.0055923)
Supplement: Table S1 — Full list of significant SNP-DMH probe set pairs. (XLS) [file pone.0055923.s003.xls]

## Sheet: Sheet1
Probe Epi_ID	CHR	Probe Start (b37)	Probe End (b37)	pvalue	SNP rs ID (multiple rs IDs represent equally ranked SNPs)
EpiGII1027953Q	chr3	176822139	176822281	8.384e-12	rs880210
EpiGII1027953Q	chr3	176822139	176822281	9.643e-12	rs1211719
EpiGII1027953Q	chr3	176822139	176822281	1.205e-10	rs1201295
EpiGII1027953Q	chr3	176822139	176822281	1.579e-11	rs1209034
EpiGII1027953Q	chr3	176822139	176822281	1.154e-11	rs1201293
EpiGII1027953Q	chr3	176822139	176822281	7.183e-12	rs1201291
EpiGII1027953Q	chr3	176822139	176822281	7.065e-12	rs1201290
EpiGII1027953Q	chr3	176822139	176822281	4.142e-12	rs1201298
EpiGII1027953Q	chr3	176822139	176822281	3.221e-11	rs1201297
EpiGII1027953Q	chr3	176822139	176822281	2.191e-06	rs1201835
EpiGII1027953Q	chr3	176822139	176822281	6.767e-12	rs6785871
EpiGII1027953Q	chr3	176822139	176822281	1.366e-10	rs6443428
EpiGII1027953Q	chr3	176822139	176822281	1.7e-10	rs2141599
EpiGII1027953Q	chr3	176822139	176822281	6.787e-12	rs4857819
EpiGII1027953Q	chr3	176822139	176822281	6.813e-12	rs7613353
EpiGII1027953Q	chr3	176822139	176822281	6.827e-12	rs7426456
EpiGII1035732Q	chr3	179040338	179040601	1.156e-06	rs10513760
EpiGII1052897Q	chr3	184052376	184052634	2.707e-06	rs10937181
EpiGII1083066Q	chr3	192778112	192778492	4.933e-13	3-192773535
EpiGII1083066Q	chr3	192778112	192778492	1.486e-10	rs1447836
EpiGII1083066Q	chr3	192778112	192778492	1.692e-10	rs59757105
EpiGII1083066Q	chr3	192778112	192778492	1.46e-10	rs56106153
EpiGII1083066Q	chr3	192778112	192778492	1.469e-10	rs55917376
EpiGII1083066Q	chr3	192778112	192778492	1.536e-10	3-192791065
EpiGII1083066Q	chr3	192778112	192778492	2.881e-10	rs60748984
EpiGII1083066Q	chr3	192778112	192778492	3.168e-10	rs57515015
EpiGII1083066Q	chr3	192778112	192778492	2.12e-10	3-192793360
EpiGII1083066Q	chr3	192778112	192778492	1.803e-10	rs58276603
EpiGII1083066Q	chr3	192778112	192778492	3.952e-10	rs4462893
EpiGII1083066Q	chr3	192778112	192778492	4.384e-10	3-192799003
EpiGII1083066Q	chr3	192778112	192778492	2.883e-10	rs56259814
EpiGII1083066Q	chr3	192778112	192778492	7.862e-10	rs55853286
EpiGII1083066Q	chr3	192778112	192778492	4.535e-10	3-192800029
EpiGII1083066Q	chr3	192778112	192778492	4.782e-10	rs7628596,rs56261130
EpiGII1083066Q	chr3	192778112	192778492	4.853e-10	3-192801020
EpiGII1083066Q	chr3	192778112	192778492	4.996e-10	3-192801924
EpiGII1083066Q	chr3	192778112	192778492	6.502e-10	3-192802235
EpiGII1083066Q	chr3	192778112	192778492	9.013e-10	rs12635500
EpiGII1083066Q	chr3	192778112	192778492	4.011e-10	3-192802822
EpiGII1083066Q	chr3	192778112	192778492	7.19e-10	rs59190423
EpiGII1083066Q	chr3	192778112	192778492	6.719e-10	rs62288404
EpiGII1083066Q	chr3	192778112	192778492	8.63e-09	3-192809537
EpiGII1083066Q	chr3	192778112	192778492	1.017e-08	rs1498657
EpiGII1083066Q	chr3	192778112	192778492	1.053e-08	3-192814610
EpiGII1083066Q	chr3	192778112	192778492	1.063e-08	3-192815820
EpiGII1083066Q	chr3	192778112	192778492	1.294e-07	3-192819295
EpiGII1083066Q	chr3	192778112	192778492	9.239e-08	3-192820722
EpiGII1083066Q	chr3	192778112	192778492	1.074e-08	3-192822822
EpiGII119081Q	chr1	228075665	228075925	9.991e-08	rs6690181
EpiGII119081Q	chr1	228075665	228075925	2.684e-07	rs6690903
EpiGII119081Q	chr1	228075665	228075925	1.945e-06	rs4653524
EpiGII119081Q	chr1	228075665	228075925	2.708e-07	rs4653879
EpiGII119081Q	chr1	228075665	228075925	2.667e-07	rs12062317
EpiGII119081Q	chr1	228075665	228075925	2.668e-07	rs4233230
EpiGII119081Q	chr1	228075665	228075925	2.719e-07	rs878811
EpiGII119081Q	chr1	228075665	228075925	2.975e-07	1-228078132
EpiGII119081Q	chr1	228075665	228075925	2.807e-07	rs4653881
EpiGII119081Q	chr1	228075665	228075925	2.575e-07	rs10916239
EpiGII1278944Q	chr5	63700343	63700504	2.161e-06	5-63267358
EpiGII1278944Q	chr5	63700343	63700504	8.833e-07	rs4392581
EpiGII1278944Q	chr5	63700343	63700504	2.069e-06	5-63282670
EpiGII1278944Q	chr5	63700343	63700504	2.617e-06	5-63295464
EpiGII1278944Q	chr5	63700343	63700504	2.634e-06	5-63301341
EpiGII1278944Q	chr5	63700343	63700504	1.201e-06	5-63316281
EpiGII1278944Q	chr5	63700343	63700504	6.856e-08	5-63317079
EpiGII1278944Q	chr5	63700343	63700504	2.079e-06	5-63326726
EpiGII1278944Q	chr5	63700343	63700504	1.973e-06	rs173337
EpiGII1278944Q	chr5	63700343	63700504	2.124e-06	rs56234855
EpiGII1278944Q	chr5	63700343	63700504	2.115e-06	rs7715864
EpiGII1278944Q	chr5	63700343	63700504	1.109e-08	5-63346226
EpiGII1278944Q	chr5	63700343	63700504	1.932e-07	rs356611
EpiGII1278944Q	chr5	63700343	63700504	2.985e-11	rs6875030
EpiGII1278944Q	chr5	63700343	63700504	9.813e-12	rs55990208
EpiGII1278944Q	chr5	63700343	63700504	8.195e-12	5-63383378
EpiGII1278944Q	chr5	63700343	63700504	6.86e-12	5-63388758
EpiGII1278944Q	chr5	63700343	63700504	4.033e-12	5-63392214
EpiGII1278944Q	chr5	63700343	63700504	3.296e-12	rs55954319
EpiGII1278944Q	chr5	63700343	63700504	3.179e-12	5-63393191
EpiGII1278944Q	chr5	63700343	63700504	2.868e-12	5-63395884,5-63396390
EpiGII1278944Q	chr5	63700343	63700504	1.694e-11	5-63401047
EpiGII1278944Q	chr5	63700343	63700504	2.833e-11	rs12513862
EpiGII1278944Q	chr5	63700343	63700504	1.783e-11	5-63405773
EpiGII1278944Q	chr5	63700343	63700504	9.279e-12	5-63408392
EpiGII1278944Q	chr5	63700343	63700504	1.309e-09	5-63409009
EpiGII1278944Q	chr5	63700343	63700504	3.024e-12	rs56040238
EpiGII1278944Q	chr5	63700343	63700504	3.036e-12	5-63416180,rs7738006
EpiGII1278944Q	chr5	63700343	63700504	9.514e-13	5-63431910,rs1584534,rs12520115,rs6860976,5-63505958
EpiGII1278944Q	chr5	63700343	63700504	4.435e-12	5-63432692
EpiGII1278944Q	chr5	63700343	63700504	7.04e-13	5-63437276
EpiGII1278944Q	chr5	63700343	63700504	7.575e-12	rs6865545
EpiGII1278944Q	chr5	63700343	63700504	3.011e-12	5-63452749,5-63491930,5-63630499,5-63655885,5-63672134
EpiGII1278944Q	chr5	63700343	63700504	3.035e-12	rs56170654,rs57918324,5-63463521,5-63466792,5-63474359,rs60220868,5-63485903,rs6880454,5-63491430,5-63548389,5-63565395,5-63598055,rs7724701
EpiGII1278944Q	chr5	63700343	63700504	2.11e-11	5-63463143
EpiGII1278944Q	chr5	63700343	63700504	9.284e-12	5-63469524
EpiGII1278944Q	chr5	63700343	63700504	3.04e-12	5-63473841
EpiGII1278944Q	chr5	63700343	63700504	1.591e-11	5-63474134
EpiGII1278944Q	chr5	63700343	63700504	3.35e-12	5-63496825
EpiGII1278944Q	chr5	63700343	63700504	5.083e-10	5-63504920
EpiGII1278944Q	chr5	63700343	63700504	9.349e-13	5-63505595
EpiGII1278944Q	chr5	63700343	63700504	7.225e-12	5-63515402,rs12523236
EpiGII1278944Q	chr5	63700343	63700504	3.865e-12	rs12520621
EpiGII1278944Q	chr5	63700343	63700504	4.284e-11	rs12514446
EpiGII1278944Q	chr5	63700343	63700504	4.863e-12	rs12515224
EpiGII1278944Q	chr5	63700343	63700504	2.855e-11	5-63533728,5-63543640
EpiGII1278944Q	chr5	63700343	63700504	5.794e-12	rs56108085
EpiGII1278944Q	chr5	63700343	63700504	2.637e-12	5-63561135
EpiGII1278944Q	chr5	63700343	63700504	3.333e-12	rs56840050
EpiGII1278944Q	chr5	63700343	63700504	3.094e-12	5-63569040
EpiGII1278944Q	chr5	63700343	63700504	3.318e-12	rs1947093
EpiGII1278944Q	chr5	63700343	63700504	9.649e-13	5-63585124
EpiGII1278944Q	chr5	63700343	63700504	3.153e-12	5-63591399
EpiGII1278944Q	chr5	63700343	63700504	3.152e-11	rs56310961
EpiGII1278944Q	chr5	63700343	63700504	2.937e-12	5-63611518
EpiGII1278944Q	chr5	63700343	63700504	3.044e-12	rs12515908
EpiGII1278944Q	chr5	63700343	63700504	2.863e-11	5-63637353,rs7446357,rs2121168
EpiGII1278944Q	chr5	63700343	63700504	1.392e-09	rs12522482
EpiGII1278944Q	chr5	63700343	63700504	2.987e-12	rs12519423,5-63659547,rs56029990,5-63665448,5-63667188
EpiGII1278944Q	chr5	63700343	63700504	2.87e-11	5-63660295
EpiGII1278944Q	chr5	63700343	63700504	1.808e-11	5-63673677
EpiGII1278944Q	chr5	63700343	63700504	2.702e-12	5-63682135
EpiGII1278944Q	chr5	63700343	63700504	1.704e-11	5-63694200
EpiGII1278944Q	chr5	63700343	63700504	2.887e-12	5-63694473,5-63694517,5-63696258
EpiGII1278944Q	chr5	63700343	63700504	1.23e-10	rs7708561,5-63704838,5-63705881,rs12522846
EpiGII1278944Q	chr5	63700343	63700504	1.216e-10	5-63707222
EpiGII1278944Q	chr5	63700343	63700504	1.334e-10	5-63709164
EpiGII1278944Q	chr5	63700343	63700504	1.41e-10	5-63714442
EpiGII1278944Q	chr5	63700343	63700504	1.47e-10	5-63715116
EpiGII1278944Q	chr5	63700343	63700504	3.614e-10	5-63738126
EpiGII1278944Q	chr5	63700343	63700504	1.553e-09	5-63740813
EpiGII1278944Q	chr5	63700343	63700504	4.752e-09	rs16892721
EpiGII1278944Q	chr5	63700343	63700504	7.617e-10	5-63744367
EpiGII1278944Q	chr5	63700343	63700504	7.672e-10	rs10514972
EpiGII1278944Q	chr5	63700343	63700504	7.933e-10	rs34403320
EpiGII1278944Q	chr5	63700343	63700504	8.059e-10	5-63755253
EpiGII1278944Q	chr5	63700343	63700504	6.188e-08	5-63756644
EpiGII1278944Q	chr5	63700343	63700504	8.203e-10	5-63757957
EpiGII1278944Q	chr5	63700343	63700504	5.331e-09	5-63760535
EpiGII1278944Q	chr5	63700343	63700504	7.844e-10	5-63760713
EpiGII1278944Q	chr5	63700343	63700504	8.333e-10	5-63760829
EpiGII1278944Q	chr5	63700343	63700504	8.494e-10	5-63766707
EpiGII1278944Q	chr5	63700343	63700504	7.36e-10	5-63767876
EpiGII1278944Q	chr5	63700343	63700504	9.596e-10	5-63768232
EpiGII1278944Q	chr5	63700343	63700504	5.998e-08	5-63779913
EpiGII1278944Q	chr5	63700343	63700504	1.217e-08	5-63780636
EpiGII1278944Q	chr5	63700343	63700504	3.548e-08	rs34068569
EpiGII1423698Q	chr5	78281698	78281893	6.111e-07	rs62377912
EpiGII1423698Q	chr5	78281698	78281893	5.148e-07	rs62377913
EpiGII1423698Q	chr5	78281698	78281893	9.881e-07	rs55814625
EpiGII1423698Q	chr5	78281698	78281893	6.95e-07	rs55953431
EpiGII1423698Q	chr5	78281698	78281893	4.235e-07	rs59558132
EpiGII1423698Q	chr5	78281698	78281893	4.421e-07	rs62377914
EpiGII1423698Q	chr5	78281698	78281893	4.088e-07	rs57586329
EpiGII1423698Q	chr5	78281698	78281893	3.739e-07	rs163126
EpiGII1423698Q	chr5	78281698	78281893	3.522e-07	rs163125
EpiGII1423698Q	chr5	78281698	78281893	7.986e-07	rs163124
EpiGII1423698Q	chr5	78281698	78281893	5.317e-07	rs500390
EpiGII1423698Q	chr5	78281698	78281893	4.553e-07	rs163133
EpiGII1423698Q	chr5	78281698	78281893	9.383e-07	rs663646
EpiGII1423698Q	chr5	78281698	78281893	4.711e-07	rs152727
EpiGII1510592Q	chr6	74230015	74230448	2.136e-07	rs35592974
EpiGII1619588Q	chr6	165729959	165730386	1.663e-06	rs617910
EpiGII1619588Q	chr6	165729959	165730386	1.659e-06	rs496252
EpiGII1619588Q	chr6	165729959	165730386	1.654e-06	rs501712
EpiGII1619588Q	chr6	165729959	165730386	1.248e-06	rs556752,rs534925
EpiGII1619588Q	chr6	165729959	165730386	1.211e-06	rs532173
EpiGII1619588Q	chr6	165729959	165730386	1.246e-06	rs529165
EpiGII1619588Q	chr6	165729959	165730386	1.245e-06	rs590993
EpiGII1619588Q	chr6	165729959	165730386	1.402e-06	rs504498
EpiGII1619588Q	chr6	165729959	165730386	1.221e-06	rs501091
EpiGII1619588Q	chr6	165729959	165730386	1.231e-06	rs499006
EpiGII1619588Q	chr6	165729959	165730386	1.25e-06	rs497358
EpiGII1619588Q	chr6	165729959	165730386	9.345e-07	rs680805
EpiGII1619588Q	chr6	165729959	165730386	1.226e-06	rs476618
EpiGII1619588Q	chr6	165729959	165730386	1.222e-06	rs579139
EpiGII1619588Q	chr6	165729959	165730386	1.19e-06	rs666381,rs547889
EpiGII1619588Q	chr6	165729959	165730386	1.153e-06	rs551504
EpiGII1619588Q	chr6	165729959	165730386	9.699e-07	rs550811
EpiGII1619588Q	chr6	165729959	165730386	1.212e-06	rs637735
EpiGII1619588Q	chr6	165729959	165730386	9.865e-07	rs637343
EpiGII1619588Q	chr6	165729959	165730386	1.138e-06	rs547832
EpiGII1619588Q	chr6	165729959	165730386	1.146e-06	rs524122
EpiGII1619588Q	chr6	165729959	165730386	1.178e-06	rs523056
EpiGII1619588Q	chr6	165729959	165730386	1.189e-06	rs522390
EpiGII1619588Q	chr6	165729959	165730386	1.168e-06	rs522248
EpiGII1619588Q	chr6	165729959	165730386	6.344e-07	rs622800
EpiGII1619588Q	chr6	165729959	165730386	1.106e-06	rs860401
EpiGII1619588Q	chr6	165729959	165730386	1.09e-06	rs571366,rs493931
EpiGII1619588Q	chr6	165729959	165730386	1.083e-06	rs619736
EpiGII1619588Q	chr6	165729959	165730386	1.193e-06	rs592768
EpiGII1619588Q	chr6	165729959	165730386	1.564e-06	rs485667
EpiGII1619588Q	chr6	165729959	165730386	1.763e-06	rs499235
EpiGII1619588Q	chr6	165729959	165730386	1.591e-06	rs489431
EpiGII1619588Q	chr6	165729959	165730386	1.801e-06	rs536555
EpiGII1619588Q	chr6	165729959	165730386	1.709e-06	rs509909
EpiGII1619588Q	chr6	165729959	165730386	1.802e-06	rs480275,rs479290
EpiGII1619588Q	chr6	165729959	165730386	3.329e-06	rs507362
EpiGII1619588Q	chr6	165729959	165730386	2.36e-06	rs500017
EpiGII1619588Q	chr6	165729959	165730386	1.925e-06	rs7753220
EpiGII1619588Q	chr6	165729959	165730386	1.984e-06	rs495725
EpiGII1619588Q	chr6	165729959	165730386	2.154e-06	rs575669
EpiGII1619588Q	chr6	165729959	165730386	2.351e-06	rs486002
EpiGII1619588Q	chr6	165729959	165730386	2.314e-06	rs554575
EpiGII1622451Q	chr6	166582675	166582968	1.466e-06	rs6928596
EpiGII1625292Q	chr6	167450032	167450170	2.849e-06	rs2236312
EpiGII1625292Q	chr6	167450032	167450170	1.329e-06	rs3798307
EpiGII1625292Q	chr6	167450032	167450170	4.858e-08	rs3756838
EpiGII1625292Q	chr6	167450032	167450170	3.303e-08	rs9366076
EpiGII1625292Q	chr6	167450032	167450170	3.326e-08	rs62436424
EpiGII1625292Q	chr6	167450032	167450170	4.581e-08	rs57444856
EpiGII1625292Q	chr6	167450032	167450170	1.869e-08	rs7772112
EpiGII1625292Q	chr6	167450032	167450170	1.234e-10	rs239931
EpiGII1625292Q	chr6	167450032	167450170	1.721e-10	rs162287
EpiGII1625292Q	chr6	167450032	167450170	1.291e-10	rs162289
EpiGII1625292Q	chr6	167450032	167450170	1.433e-10	rs162291
EpiGII1625292Q	chr6	167450032	167450170	1.249e-10	rs162293,rs162295,rs162297
EpiGII1625292Q	chr6	167450032	167450170	1.252e-10	rs162294
EpiGII1689143Q	chr6	26568897	26569208	2.716e-08	rs16891264,6-26072981,rs7749414
EpiGII1689143Q	chr6	26568897	26569208	1.893e-09	rs34888489
EpiGII1689143Q	chr6	26568897	26569208	1.298e-08	rs34027471,rs9358946
EpiGII1689143Q	chr6	26568897	26569208	1.887e-09	rs34197618
EpiGII1689143Q	chr6	26568897	26569208	9.869e-08	rs36109883
EpiGII1689143Q	chr6	26568897	26569208	8.464e-07	rs3857546,rs7749823
EpiGII1689143Q	chr6	26568897	26569208	7.987e-07	rs1417998
EpiGII1689143Q	chr6	26568897	26569208	6.339e-07	rs34661691
EpiGII1689143Q	chr6	26568897	26569208	2.993e-09	rs17598658
EpiGII1689143Q	chr6	26568897	26569208	3.163e-09	rs13204572
EpiGII1689143Q	chr6	26568897	26569208	3.137e-07	6-26196593
EpiGII1689143Q	chr6	26568897	26569208	1.723e-09	rs34961555
EpiGII1689143Q	chr6	26568897	26569208	3.229e-11	rs55706012
EpiGII1689143Q	chr6	26568897	26569208	3.126e-11	rs10484439,rs13220522,rs35162296
EpiGII1689143Q	chr6	26568897	26569208	1.82e-10	rs9467701,rs6923139,rs6902392,rs6903015
EpiGII1689143Q	chr6	26568897	26569208	1.763e-10	rs1883215
EpiGII1689143Q	chr6	26568897	26569208	1.11e-08	rs11966360
EpiGII1689143Q	chr6	26568897	26569208	1.279e-10	rs9467704
EpiGII1689143Q	chr6	26568897	26569208	9.313e-12	rs6902389
EpiGII1689143Q	chr6	26568897	26569208	2.396e-10	rs6908156
EpiGII1689143Q	chr6	26568897	26569208	4.917e-11	rs9467707
EpiGII1689143Q	chr6	26568897	26569208	2.372e-11	rs34107459
EpiGII1689143Q	chr6	26568897	26569208	9.824e-11	rs34569761
EpiGII1689143Q	chr6	26568897	26569208	2.217e-11	rs34158769
EpiGII1689143Q	chr6	26568897	26569208	9.488e-11	rs9467713
EpiGII1689143Q	chr6	26568897	26569208	1.284e-11	rs35942569
EpiGII1689143Q	chr6	26568897	26569208	3.104e-10	rs9467714
EpiGII1689143Q	chr6	26568897	26569208	4.623e-10	rs9379850
EpiGII1689143Q	chr6	26568897	26569208	1.216e-15	6-26354100,rs9393707,rs9358934
EpiGII1689143Q	chr6	26568897	26569208	3.028e-06	rs9366652
EpiGII1689143Q	chr6	26568897	26569208	1.174e-15	rs9366653
EpiGII1689143Q	chr6	26568897	26569208	1.21e-15	rs9379851,rs35934643,rs9379852
EpiGII1689143Q	chr6	26568897	26569208	3.026e-06	rs6933583,rs4712981
EpiGII1689143Q	chr6	26568897	26569208	3.054e-06	rs4712980
EpiGII1689143Q	chr6	26568897	26569208	1.23e-15	rs35304979
EpiGII1689143Q	chr6	26568897	26569208	3.015e-06	rs9467725
EpiGII1689143Q	chr6	26568897	26569208	9.361e-16	6-26356853
EpiGII1689143Q	chr6	26568897	26569208	1.188e-15	rs9393703
EpiGII1689143Q	chr6	26568897	26569208	6.345e-15	rs9358930
EpiGII1689143Q	chr6	26568897	26569208	1.205e-15	rs9379853
EpiGII1689143Q	chr6	26568897	26569208	1.199e-15	rs9393704,6-26359241,rs9366654
EpiGII1689143Q	chr6	26568897	26569208	1.196e-15	rs9348709,rs9393705,rs9393706
EpiGII1689143Q	chr6	26568897	26569208	3.584e-08	rs9348711
EpiGII1689143Q	chr6	26568897	26569208	3.029e-06	rs10946816
EpiGII1689143Q	chr6	26568897	26569208	1.295e-07	rs34550936
EpiGII1689143Q	chr6	26568897	26569208	2.685e-15	rs34622023
EpiGII1689143Q	chr6	26568897	26569208	1.219e-15	rs9393708
EpiGII1689143Q	chr6	26568897	26569208	1.221e-15	rs9358932
EpiGII1689143Q	chr6	26568897	26569208	1.224e-15	rs9379854
EpiGII1689143Q	chr6	26568897	26569208	2.922e-06	rs9358933
EpiGII1689143Q	chr6	26568897	26569208	1.267e-15	rs9357006
EpiGII1689143Q	chr6	26568897	26569208	1.274e-15	rs9379855
EpiGII1689143Q	chr6	26568897	26569208	1.291e-15	rs28362606
EpiGII1689143Q	chr6	26568897	26569208	1.8e-14	rs58825580
EpiGII1689143Q	chr6	26568897	26569208	1.298e-15	6-26365759,6-26365766
EpiGII1689143Q	chr6	26568897	26569208	1.301e-15	6-26365913
EpiGII1689143Q	chr6	26568897	26569208	1.312e-15	rs9348712
EpiGII1689143Q	chr6	26568897	26569208	1.323e-15	rs9379856
EpiGII1689143Q	chr6	26568897	26569208	1.353e-15	rs9379857,rs9379858
EpiGII1689143Q	chr6	26568897	26569208	1.357e-15	rs9393710
EpiGII1689143Q	chr6	26568897	26569208	1.365e-15	6-26368279
EpiGII1689143Q	chr6	26568897	26569208	1.398e-15	rs56227620
EpiGII1689143Q	chr6	26568897	26569208	1.411e-15	rs9379859,rs9358935,rs35307327,rs9358936,rs9393711,rs12173854,rs9379863,rs9379864,rs12176317,rs12174602,rs12174623,rs12174639,rs12174631,rs13216828,rs9393713,rs35627490,rs3823158,rs13195509,rs3734542,rs3734543
EpiGII1689143Q	chr6	26568897	26569208	1.442e-15	rs34436535
EpiGII1689143Q	chr6	26568897	26569208	1.202e-15	rs34878490
EpiGII1689143Q	chr6	26568897	26569208	1.732e-07	rs9379862
EpiGII1689143Q	chr6	26568897	26569208	1.78e-14	rs9393712
EpiGII1689143Q	chr6	26568897	26569208	1.488e-17	rs9393714
EpiGII1689143Q	chr6	26568897	26569208	1.397e-15	rs9358937
EpiGII1689143Q	chr6	26568897	26569208	3.004e-06	rs733528
EpiGII1689143Q	chr6	26568897	26569208	1.06e-15	rs2073527
EpiGII1689143Q	chr6	26568897	26569208	2.998e-06	rs2073528
EpiGII1689143Q	chr6	26568897	26569208	1.373e-15	rs2073529,rs2073531
EpiGII1689143Q	chr6	26568897	26569208	1.592e-15	rs2073530
EpiGII1689143Q	chr6	26568897	26569208	2.983e-06	rs9348715
EpiGII1689143Q	chr6	26568897	26569208	1.369e-15	rs9393715,rs9348716
EpiGII1689143Q	chr6	26568897	26569208	1.36e-15	rs9379871
EpiGII1689143Q	chr6	26568897	26569208	1.351e-15	rs3757138
EpiGII1689143Q	chr6	26568897	26569208	1.287e-15	6-26376314,rs1977
EpiGII1689143Q	chr6	26568897	26569208	1.007e-15	rs28551159
EpiGII1689143Q	chr6	26568897	26569208	2.361e-09	rs9393716
EpiGII1689143Q	chr6	26568897	26569208	1.288e-15	rs9366655
EpiGII1689143Q	chr6	26568897	26569208	1.286e-15	rs1978
EpiGII1689143Q	chr6	26568897	26569208	1.284e-15	rs1979
EpiGII1689143Q	chr6	26568897	26569208	1.679e-15	6-26377927,6-26377939
EpiGII1689143Q	chr6	26568897	26569208	1.361e-15	6-26378288
EpiGII1689143Q	chr6	26568897	26569208	3.078e-15	rs2072806
EpiGII1689143Q	chr6	26568897	26569208	2.119e-15	rs9358938
EpiGII1689143Q	chr6	26568897	26569208	3.432e-15	rs2072803
EpiGII1689143Q	chr6	26568897	26569208	2.431e-15	rs9379873
EpiGII1689143Q	chr6	26568897	26569208	1.273e-06	rs3799378
EpiGII1689143Q	chr6	26568897	26569208	3.279e-15	rs9393718
EpiGII1689143Q	chr6	26568897	26569208	5.721e-12	6-26408551,rs41266839
EpiGII1689143Q	chr6	26568897	26569208	3.315e-15	rs34273322,rs2076030,rs2235251,rs9366656
EpiGII1689143Q	chr6	26568897	26569208	3.299e-15	rs9358939
EpiGII1689143Q	chr6	26568897	26569208	2.614e-15	rs2393667
EpiGII1689143Q	chr6	26568897	26569208	1.46e-15	rs13220495
EpiGII1689143Q	chr6	26568897	26569208	3.386e-15	rs9379875,rs35942482
EpiGII1689143Q	chr6	26568897	26569208	1.407e-15	rs34605993,6-26454956,rs35680819,rs36033628
EpiGII1689143Q	chr6	26568897	26569208	2.708e-17	rs13195401,rs13195402
EpiGII1689143Q	chr6	26568897	26569208	1.019e-06	rs1977199
EpiGII1689143Q	chr6	26568897	26569208	1.023e-06	rs1977200
EpiGII1689143Q	chr6	26568897	26569208	7.854e-09	rs3799380,rs2093169
EpiGII1689143Q	chr6	26568897	26569208	1.273e-08	rs4518487
EpiGII1689143Q	chr6	26568897	26569208	9.893e-09	rs3734544
EpiGII1689143Q	chr6	26568897	26569208	1.328e-08	rs9366658
EpiGII1689143Q	chr6	26568897	26569208	1.741e-08	rs9358944
EpiGII1689143Q	chr6	26568897	26569208	1.331e-08	rs9348719
EpiGII1689143Q	chr6	26568897	26569208	1.816e-08	rs6456727
EpiGII1689143Q	chr6	26568897	26569208	7.073e-09	rs9358945
EpiGII1689143Q	chr6	26568897	26569208	1.336e-08	rs7773938
EpiGII1689143Q	chr6	26568897	26569208	2.487e-09	rs56296968
EpiGII1689143Q	chr6	26568897	26569208	1.326e-08	rs3757150
EpiGII1689143Q	chr6	26568897	26569208	1.324e-08	rs16891717
EpiGII1689143Q	chr6	26568897	26569208	1.43e-15	rs34104395
EpiGII1689143Q	chr6	26568897	26569208	1.338e-08	rs6926677
EpiGII1689143Q	chr6	26568897	26569208	1.3e-08	rs9358947
EpiGII1689143Q	chr6	26568897	26569208	3.289e-15	rs16891725
EpiGII1689143Q	chr6	26568897	26569208	1.282e-08	rs7756567
EpiGII1689143Q	chr6	26568897	26569208	2.068e-09	rs9348720
EpiGII1689143Q	chr6	26568897	26569208	1.119e-08	rs9358948
EpiGII1689143Q	chr6	26568897	26569208	2.474e-15	rs9348721
EpiGII1689143Q	chr6	26568897	26569208	2.116e-15	rs6900665
EpiGII1689143Q	chr6	26568897	26569208	2.036e-15	rs16891727
EpiGII1689143Q	chr6	26568897	26569208	9.765e-09	rs34313099
EpiGII1689143Q	chr6	26568897	26569208	1.116e-08	rs6924727
EpiGII1689143Q	chr6	26568897	26569208	1.187e-08	rs6941920
EpiGII1689143Q	chr6	26568897	26569208	2.937e-09	rs13195047
EpiGII1689143Q	chr6	26568897	26569208	1.181e-08	rs6933213
EpiGII1689143Q	chr6	26568897	26569208	1.745e-09	rs9467772
EpiGII1689143Q	chr6	26568897	26569208	1.001e-08	rs9379880
EpiGII1689143Q	chr6	26568897	26569208	6.829e-15	6-26498758
EpiGII1689143Q	chr6	26568897	26569208	1.638e-15	rs13220261
EpiGII1689143Q	chr6	26568897	26569208	3.225e-15	rs9393727,rs2295593
EpiGII1689143Q	chr6	26568897	26569208	1.404e-15	rs35555795,rs34148261,rs35433030
EpiGII1689143Q	chr6	26568897	26569208	1.091e-14	rs3799383
EpiGII1689143Q	chr6	26568897	26569208	3.287e-15	rs9379882
EpiGII1689143Q	chr6	26568897	26569208	3.559e-15	rs12176129,6-26530419,rs6920256
EpiGII1689143Q	chr6	26568897	26569208	3.147e-15	6-26530376
EpiGII1689143Q	chr6	26568897	26569208	1.406e-15	rs34246779,6-26550144,rs35277236,6-26563864
EpiGII1689143Q	chr6	26568897	26569208	1.396e-15	rs36162392
EpiGII1689143Q	chr6	26568897	26569208	1.087e-14	rs13214027
EpiGII1689143Q	chr6	26568897	26569208	1.104e-14	rs9379891
EpiGII1689143Q	chr6	26568897	26569208	2.367e-13	rs13198716
EpiGII1689143Q	chr6	26568897	26569208	1.105e-14	rs9393735
EpiGII1689143Q	chr6	26568897	26569208	1.754e-13	rs13190739
EpiGII1689143Q	chr6	26568897	26569208	2.278e-13	rs34229567
EpiGII1689143Q	chr6	26568897	26569208	2.854e-13	rs13203358
EpiGII1689143Q	chr6	26568897	26569208	2.88e-13	rs34781270
EpiGII1689143Q	chr6	26568897	26569208	3.801e-11	rs35400317,rs45527431
EpiGII1689143Q	chr6	26568897	26569208	3.539e-13	rs4634439,rs9379897,rs28360517
EpiGII1689143Q	chr6	26568897	26569208	3.992e-13	rs13208916
EpiGII1689143Q	chr6	26568897	26569208	3.507e-13	rs9379899
EpiGII1689143Q	chr6	26568897	26569208	3.537e-13	rs9379900,rs9379901
EpiGII1689143Q	chr6	26568897	26569208	2.877e-13	rs35076545
EpiGII1689143Q	chr6	26568897	26569208	2.98e-13	rs9348726
EpiGII1689143Q	chr6	26568897	26569208	2.87e-13	rs13212985
EpiGII1689143Q	chr6	26568897	26569208	3.058e-10	6-26631568,6-26633711
EpiGII1689143Q	chr6	26568897	26569208	3.377e-10	rs13201782
EpiGII1689143Q	chr6	26568897	26569208	3.594e-12	6-26670618
EpiGII1689143Q	chr6	26568897	26569208	1.058e-08	6-26706602
EpiGII1689143Q	chr6	26568897	26569208	8.834e-10	rs13211434
EpiGII1689143Q	chr6	26568897	26569208	5.118e-07	rs9393754
EpiGII1689143Q	chr6	26568897	26569208	1.205e-08	rs28673849
EpiGII1689143Q	chr6	26568897	26569208	1.637e-08	rs9368469
EpiGII1689143Q	chr6	26568897	26569208	2.757e-10	rs13220570
EpiGII1689143Q	chr6	26568897	26569208	5.21e-12	rs13213200
EpiGII1689143Q	chr6	26568897	26569208	1.043e-11	rs13195977
EpiGII1689143Q	chr6	26568897	26569208	1.919e-13	rs34244947
EpiGII1689143Q	chr6	26568897	26569208	3.522e-09	6-26803025
EpiGII1689143Q	chr6	26568897	26569208	3.08e-08	6-26803163
EpiGII1689143Q	chr6	26568897	26569208	6.227e-10	rs55664827
EpiGII1689143Q	chr6	26568897	26569208	1.254e-09	6-26840865
EpiGII1689143Q	chr6	26568897	26569208	7.787e-11	rs57440165
EpiGII1689143Q	chr6	26568897	26569208	4.841e-10	6-26849098
EpiGII1689143Q	chr6	26568897	26569208	3.625e-11	6-26851415
EpiGII1689143Q	chr6	26568897	26569208	4.112e-08	rs9348734
EpiGII1689143Q	chr6	26568897	26569208	1.905e-08	rs12176087
EpiGII1689143Q	chr6	26568897	26569208	8.452e-07	rs9366673
EpiGII1689143Q	chr6	26568897	26569208	3.386e-10	rs58060922
EpiGII1689143Q	chr6	26568897	26569208	3.504e-10	6-26903379
EpiGII1689143Q	chr6	26568897	26569208	1.076e-09	6-26903585
EpiGII1689143Q	chr6	26568897	26569208	4.277e-08	rs9379945
EpiGII1689143Q	chr6	26568897	26569208	2.28e-09	rs60882115
EpiGII1689143Q	chr6	26568897	26569208	4.258e-10	rs35173303
EpiGII1689143Q	chr6	26568897	26569208	2.559e-06	rs2770573
EpiGII1689143Q	chr6	26568897	26569208	2.5e-06	rs9393777
EpiGII1689143Q	chr6	26568897	26569208	4.27e-10	6-26942146
EpiGII1689143Q	chr6	26568897	26569208	4.28e-10	rs35869525
EpiGII1689143Q	chr6	26568897	26569208	4.267e-10	rs34816374
EpiGII1689143Q	chr6	26568897	26569208	4.298e-10	rs34546498
EpiGII1689143Q	chr6	26568897	26569208	5.488e-10	rs34864993
EpiGII1689143Q	chr6	26568897	26569208	5.476e-10	rs9717913,rs13215879
EpiGII1689143Q	chr6	26568897	26569208	5.444e-10	rs56874662
EpiGII1689143Q	chr6	26568897	26569208	5.438e-10	rs36022097,rs35212793
EpiGII1689143Q	chr6	26568897	26569208	5.428e-10	rs13217285
EpiGII1689143Q	chr6	26568897	26569208	5.441e-10	rs35769282
EpiGII1689143Q	chr6	26568897	26569208	5.417e-10	rs57713596
EpiGII1689143Q	chr6	26568897	26569208	5.167e-10	rs35741362
EpiGII1689143Q	chr6	26568897	26569208	3.775e-10	rs13191326
EpiGII1689143Q	chr6	26568897	26569208	3.778e-10	rs35608615,6-27054772
EpiGII1689143Q	chr6	26568897	26569208	5.405e-10	rs35526527
EpiGII1689143Q	chr6	26568897	26569208	2.464e-06	rs6904071
EpiGII1689143Q	chr6	26568897	26569208	2.203e-06	rs34388707
EpiGII1689143Q	chr6	26568897	26569208	2.204e-06	rs926300
EpiGII1707954AG	chr6	32188833	32189031	5.634e-07	rs520803
EpiGII1707954AG	chr6	32188833	32189031	5.526e-07	rs520692
EpiGII1707954AG	chr6	32188833	32189031	5.639e-07	rs520688
EpiGII1707954AG	chr6	32188833	32189031	7.961e-07	rs415929
EpiGII1707954AG	chr6	32188833	32189031	5.427e-07	rs45855
EpiGII1710072AG_x	chr6	32820694	32820884	2.956e-06	rs28624333
EpiGII1735794Q	chr6	40408884	40409047	2.157e-06	6-40744965
EpiGII1735794Q	chr6	40408884	40409047	2.166e-06	6-40745969
EpiGII1735794Q	chr6	40408884	40409047	2.154e-06	6-40758724
EpiGII1737362Q	chr6	40860251	40860501	1.635e-06	6-40774036
EpiGII1806709Q	chr7	158503157	158503349	4.827e-07	rs11971680
EpiGII1921930Q	chr7	21945979	21946208	2.177e-09	7-21946177
EpiGII1997158Q	chr7	43495893	43496105	2.821e-06	7-43434552
EpiGII1997158Q	chr7	43495893	43496105	7.599e-07	rs2302446
EpiGII1997158Q	chr7	43495893	43496105	9.324e-07	rs17800970
EpiGII1997158Q	chr7	43495893	43496105	9.391e-07	7-43437395
EpiGII1997158Q	chr7	43495893	43496105	9.502e-07	7-43438392
EpiGII1997158Q	chr7	43495893	43496105	1.842e-06	rs17207007
EpiGII1997158Q	chr7	43495893	43496105	8.053e-07	7-43446140
EpiGII1997158Q	chr7	43495893	43496105	1.415e-06	rs6980106
EpiGII2150420Q	chr7	100478877	100479203	1.855e-06	7-100937964
EpiGII2154525AG	chr7	101851903	101852365	3.312e-06	rs62463713
EpiGII2154525AG	chr7	101851903	101852365	1.651e-06	rs55818034,rs11974028
EpiGII2154525AG	chr7	101851903	101852365	1.604e-06	rs11980902
EpiGII2154525AG	chr7	101851903	101852365	1.966e-06	rs57093449
EpiGII2154525AG	chr7	101851903	101852365	3.811e-07	rs28727287
EpiGII2154525AG	chr7	101851903	101852365	1.415e-06	rs62463724
EpiGII223970Q	chr1	203148336	203148707	7.891e-07	rs10399805
EpiGII2264054Q	chr7	133812100	133812441	6.007e-07	rs13243553
EpiGII2264054Q	chr7	133812100	133812441	8.98e-07	rs12707123
EpiGII2264054Q	chr7	133812100	133812441	6.567e-07	rs10231102
EpiGII2264054Q	chr7	133812100	133812441	8.935e-07	rs2042456
EpiGII2264054Q	chr7	133812100	133812441	8.972e-07	rs2042455,rs13233690,rs10224683,rs10225115,rs10281716,rs10155909,rs11770927,rs7792492,rs7792546,rs7792905,rs7779370,rs889826,rs889825,rs755664,rs958405,rs958404,rs13228262,rs10264922,rs6962865,rs6963032
EpiGII2264054Q	chr7	133812100	133812441	7.304e-07	rs2042453
EpiGII2264054Q	chr7	133812100	133812441	9.382e-07	rs6955240
EpiGII2264054Q	chr7	133812100	133812441	6.541e-07	rs7798804
EpiGII2264054Q	chr7	133812100	133812441	2.79e-06	rs6972412
EpiGII2264054Q	chr7	133812100	133812441	7.101e-07	rs6958557
EpiGII2264054Q	chr7	133812100	133812441	1.916e-07	rs6954700
EpiGII2264054Q	chr7	133812100	133812441	7.29e-07	rs12707128
EpiGII2264054Q	chr7	133812100	133812441	9.33e-07	rs10253633,rs10224575
EpiGII2264054Q	chr7	133812100	133812441	9.115e-07	rs10224828
EpiGII2264054Q	chr7	133812100	133812441	5.961e-07	rs10225454
EpiGII2264054Q	chr7	133812100	133812441	1.213e-06	rs10225605
EpiGII2264054Q	chr7	133812100	133812441	9.661e-07	rs10236499
EpiGII2264054Q	chr7	133812100	133812441	9.337e-07	rs10281697
EpiGII2264054Q	chr7	133812100	133812441	8.884e-07	rs10156088
EpiGII2264054Q	chr7	133812100	133812441	1.009e-06	rs12707129
EpiGII2264054Q	chr7	133812100	133812441	9.002e-07	rs6969899
EpiGII2264054Q	chr7	133812100	133812441	8.849e-07	rs10808273
EpiGII2264054Q	chr7	133812100	133812441	8.977e-07	rs10954434
EpiGII2264054Q	chr7	133812100	133812441	9.199e-07	rs10226267
EpiGII2264054Q	chr7	133812100	133812441	9.478e-07	rs2059298
EpiGII2264054Q	chr7	133812100	133812441	9.389e-07	rs6974143
EpiGII2264054Q	chr7	133812100	133812441	9.43e-07	rs6978170
EpiGII2264054Q	chr7	133812100	133812441	1.335e-06	rs13231079
EpiGII2264054Q	chr7	133812100	133812441	9.455e-07	rs13231095
EpiGII2264054Q	chr7	133812100	133812441	9.582e-07	rs6467510
EpiGII2264054Q	chr7	133812100	133812441	9.75e-07	rs10255193
EpiGII2264054Q	chr7	133812100	133812441	1.548e-06	rs7805864
EpiGII2264054Q	chr7	133812100	133812441	9.551e-07	rs6955279
EpiGII2264054Q	chr7	133812100	133812441	9.677e-07	rs6955707
EpiGII2264054Q	chr7	133812100	133812441	9.68e-07	rs6966403
EpiGII2264054Q	chr7	133812100	133812441	1.022e-06	rs12707130
EpiGII2264054Q	chr7	133812100	133812441	1.05e-06	rs6943986
EpiGII2264054Q	chr7	133812100	133812441	1.034e-06	rs13233715
EpiGII2264054Q	chr7	133812100	133812441	1.029e-06	rs13221033
EpiGII2264054Q	chr7	133812100	133812441	1.113e-06	rs6954712
EpiGII2264054Q	chr7	133812100	133812441	1.636e-06	rs12707131
EpiGII2424610Q	chr8	119611743	119611899	2.19e-06	rs4336638
EpiGII2504294Q	chr8	54851968	54852304	1.564e-06	rs28688342
EpiGII2504294Q	chr8	54851968	54852304	1.529e-06	8-55171472
EpiGII2504294Q	chr8	54851968	54852304	1.124e-06	8-55171729
EpiGII2504294Q	chr8	54851968	54852304	1.035e-06	rs11994098
EpiGII2504294Q	chr8	54851968	54852304	1.045e-06	rs11987208
EpiGII2504294Q	chr8	54851968	54852304	1.001e-06	rs11994139
EpiGII2504294Q	chr8	54851968	54852304	1.55e-06	rs11988086
EpiGII2504294Q	chr8	54851968	54852304	1.536e-06	rs28670670
EpiGII2504294Q	chr8	54851968	54852304	1.526e-06	rs28695506
EpiGII2504294Q	chr8	54851968	54852304	1.53e-06	8-55173722
EpiGII2504294Q	chr8	54851968	54852304	1.527e-06	rs16919928
EpiGII2504294Q	chr8	54851968	54852304	1.513e-06	rs7834635
EpiGII2659339Q	chr9	7799281	7799539	1.845e-06	9-7455831
EpiGII2659339Q	chr9	7799281	7799539	2.479e-06	rs7863694
EpiGII2659339Q	chr9	7799281	7799539	1.816e-06	9-7457497
EpiGII2659339Q	chr9	7799281	7799539	1.795e-06	9-7458775
EpiGII2659339Q	chr9	7799281	7799539	1.8e-06	9-7461170
EpiGII2659339Q	chr9	7799281	7799539	1.964e-06	9-7461613
EpiGII2659339Q	chr9	7799281	7799539	1.582e-06	9-7473222
EpiGII2659339Q	chr9	7799281	7799539	1.278e-06	rs16926210
EpiGII2659339Q	chr9	7799281	7799539	1.206e-06	9-7478367
EpiGII2659339Q	chr9	7799281	7799539	1.132e-06	rs10511472
EpiGII2681860Q	chr9	14349378	14349733	2.846e-06	9-14785981
EpiGII2681860Q	chr9	14349378	14349733	2.925e-06	9-14792400
EpiGII2760967Q	chr9	37161648	37161807	6.117e-08	rs17408134
EpiGII2760967Q	chr9	37161648	37161807	5.859e-08	rs62535711
EpiGII2760967Q	chr9	37161648	37161807	9.673e-08	rs62535722
EpiGII2771867Q	chr9	99259319	99259718	2.13e-07	rs10761013,rs10739886,rs7037607
EpiGII2771867Q	chr9	99259319	99259718	2.463e-07	rs4336730
EpiGII2771867Q	chr9	99259319	99259718	2.147e-07	rs10820626,rs7858287,rs10122900
EpiGII2771867Q	chr9	99259319	99259718	2.192e-07	rs7861282
EpiGII2771867Q	chr9	99259319	99259718	2.318e-07	rs7048424
EpiGII2771867Q	chr9	99259319	99259718	8.871e-08	rs10820629,rs10820630
EpiGII2771867Q	chr9	99259319	99259718	2.128e-07	rs10820632
EpiGII2771867Q	chr9	99259319	99259718	2.273e-07	rs754559
EpiGII2771867Q	chr9	99259319	99259718	2.166e-07	rs10820634
EpiGII2771867Q	chr9	99259319	99259718	2.098e-07	rs60076414,rs10991352,rs10991354,rs7030316
EpiGII2771867Q	chr9	99259319	99259718	2.055e-07	rs3802441
EpiGII2771867Q	chr9	99259319	99259718	1.046e-07	9-99224962
EpiGII2771867Q	chr9	99259319	99259718	2.764e-07	rs16910858
EpiGII2771867Q	chr9	99259319	99259718	2.149e-07	rs10820666,rs7038932,rs7865488
EpiGII2771867Q	chr9	99259319	99259718	2.057e-07	rs10761035
EpiGII2771867Q	chr9	99259319	99259718	2.317e-07	rs10820682
EpiGII2771867Q	chr9	99259319	99259718	1.685e-07	rs7039472
EpiGII2771867Q	chr9	99259319	99259718	2.094e-07	rs7031099,rs1590971,rs10512239,rs10991346,rs10991348
EpiGII2771867Q	chr9	99259319	99259718	2.044e-07	rs16910870
EpiGII2771867Q	chr9	99259319	99259718	1.747e-07	rs34476861
EpiGII2771867Q	chr9	99259319	99259718	2.217e-07	rs34447339
EpiGII2771867Q	chr9	99259319	99259718	1.61e-07	rs12379374
EpiGII2771867Q	chr9	99259319	99259718	2.113e-07	rs7867323
EpiGII2771867Q	chr9	99259319	99259718	2.112e-07	rs7848376
EpiGII2771867Q	chr9	99259319	99259718	1.99e-07	rs1057687
EpiGII2771867Q	chr9	99259319	99259718	1.994e-07	rs6477493
EpiGII2771867Q	chr9	99259319	99259718	1.986e-07	rs10991367
EpiGII2771867Q	chr9	99259319	99259718	2.96e-07	rs7867618
EpiGII2771867Q	chr9	99259319	99259718	1.39e-06	rs6477495
EpiGII2771867Q	chr9	99259319	99259718	1.976e-07	rs10991369,rs12376719
EpiGII2771867Q	chr9	99259319	99259718	1.956e-07	rs7849634
EpiGII2771867Q	chr9	99259319	99259718	1.972e-07	rs6477496
EpiGII2771867Q	chr9	99259319	99259718	1.916e-07	rs6477497
EpiGII2771867Q	chr9	99259319	99259718	1.373e-07	rs10820727
EpiGII2771867Q	chr9	99259319	99259718	1.965e-07	rs2181071
EpiGII2771867Q	chr9	99259319	99259718	1.963e-07	rs1005094,rs10512238
EpiGII2771867Q	chr9	99259319	99259718	1.958e-07	rs10121676
EpiGII2771867Q	chr9	99259319	99259718	1.951e-07	rs10991378
EpiGII2771867Q	chr9	99259319	99259718	5.951e-08	rs10991379
EpiGII2771867Q	chr9	99259319	99259718	1.928e-07	rs7871404
EpiGII2771867Q	chr9	99259319	99259718	2.171e-07	rs7021496
EpiGII2771867Q	chr9	99259319	99259718	2.111e-07	rs3802443,rs10820739
EpiGII2771867Q	chr9	99259319	99259718	2.109e-07	rs7860447
EpiGII2771867Q	chr9	99259319	99259718	2.187e-07	rs10114668
EpiGII2771867Q	chr9	99259319	99259718	2.206e-07	rs10820741
EpiGII2771867Q	chr9	99259319	99259718	1.103e-06	rs10119967
EpiGII2771867Q	chr9	99259319	99259718	2.923e-07	rs10118793
EpiGII2771867Q	chr9	99259319	99259718	2.21e-07	rs10991399
EpiGII2771867Q	chr9	99259319	99259718	2.914e-07	rs10820745
EpiGII2771867Q	chr9	99259319	99259718	1.813e-07	rs10820746
EpiGII2771867Q	chr9	99259319	99259718	2.216e-07	rs7856709
EpiGII2771867Q	chr9	99259319	99259718	2.328e-07	rs10120119
EpiGII2771867Q	chr9	99259319	99259718	2.009e-07	9-99279508
EpiGII2771867Q	chr9	99259319	99259718	2.167e-07	rs10820757
EpiGII2825376Q	chr9	114695104	114695251	6.974e-08	rs7872317,rs10759560
EpiGII2825376Q	chr9	114695104	114695251	2.539e-07	rs944356
EpiGII2825376Q	chr9	114695104	114695251	4.038e-08	rs4979114
EpiGII2825376Q	chr9	114695104	114695251	6.95e-08	rs10817339
EpiGII2825376Q	chr9	114695104	114695251	2.772e-07	rs62569989
EpiGII2856776Q	chr9	123622356	123622808	2.136e-07	rs1803347
EpiGII2856776Q	chr9	123622356	123622808	2.449e-07	rs7853284
EpiGII2856776Q	chr9	123622356	123622808	2.013e-07	rs10985217
EpiGII2856776Q	chr9	123622356	123622808	1.925e-07	rs41316974
EpiGII2856776Q	chr9	123622356	123622808	2.007e-07	rs58052380
EpiGII2856776Q	chr9	123622356	123622808	2.374e-07	rs58212502
EpiGII2868506Q	chr9	127116979	127117345	4.289e-07	rs10986284
EpiGII2868506Q	chr9	127116979	127117345	5.466e-07	rs3949752
EpiGII2868506Q	chr9	127116979	127117345	3.814e-07	rs35711908
EpiGII2868506Q	chr9	127116979	127117345	2.715e-07	rs10818936
EpiGII2868506Q	chr9	127116979	127117345	9.003e-07	rs7856570
EpiGII2868506Q	chr9	127116979	127117345	3.543e-07	rs10818937
EpiGII2868506Q	chr9	127116979	127117345	1.152e-06	rs10986291
EpiGII2868506Q	chr9	127116979	127117345	1.345e-06	rs10986292
EpiGII2868506Q	chr9	127116979	127117345	5.61e-07	rs34071757
EpiGII2868506Q	chr9	127116979	127117345	2.034e-06	rs2282084
EpiGII2868506Q	chr9	127116979	127117345	5.752e-07	rs944337
EpiGII2868506Q	chr9	127116979	127117345	4.909e-07	rs944338
EpiGII2868506Q	chr9	127116979	127117345	5.771e-07	rs2026190
EpiGII2868506Q	chr9	127116979	127117345	2.118e-06	rs2282085
EpiGII2868506Q	chr9	127116979	127117345	6.199e-07	rs10760344
EpiGII2868506Q	chr9	127116979	127117345	1.055e-06	rs34011920
EpiGII2868506Q	chr9	127116979	127117345	2.244e-06	rs34720542
EpiGII2868506Q	chr9	127116979	127117345	9.979e-07	rs35068124
EpiGII2868506Q	chr9	127116979	127117345	5.94e-07	rs10116520
EpiGII2868506Q	chr9	127116979	127117345	4.151e-07	rs12379417
EpiGII2868506Q	chr9	127116979	127117345	8.576e-07	rs1045774
EpiGII2868506Q	chr9	127116979	127117345	5.285e-07	rs35956754
EpiGII2868506Q	chr9	127116979	127117345	1.032e-06	rs7853472
EpiGII2868506Q	chr9	127116979	127117345	1.425e-06	rs10760345
EpiGII2868506Q	chr9	127116979	127117345	1.564e-07	rs4836970
EpiGII2868506Q	chr9	127116979	127117345	5.844e-09	rs944339
EpiGII2868506Q	chr9	127116979	127117345	3.26e-07	rs7861040
EpiGII2868506Q	chr9	127116979	127117345	1.578e-07	rs10818938
EpiGII2868506Q	chr9	127116979	127117345	4.631e-09	rs10760347
EpiGII2868506Q	chr9	127116979	127117345	6.4e-10	rs871998
EpiGII2868506Q	chr9	127116979	127117345	2.19e-07	rs10118498
EpiGII2868506Q	chr9	127116979	127117345	1.478e-06	rs944340
EpiGII2868506Q	chr9	127116979	127117345	2.998e-08	rs10986307
EpiGII2868506Q	chr9	127116979	127117345	5.132e-08	rs10818940
EpiGII2868506Q	chr9	127116979	127117345	6.267e-11	rs10760351
EpiGII2868506Q	chr9	127116979	127117345	4.699e-08	rs3758212
EpiGII2868506Q	chr9	127116979	127117345	1.311e-09	rs4838160
EpiGII2868506Q	chr9	127116979	127117345	3.057e-07	rs10986311
EpiGII2868506Q	chr9	127116979	127117345	9.558e-08	rs1107342
EpiGII2868506Q	chr9	127116979	127117345	1.733e-09	rs2274780
EpiGII2868506Q	chr9	127116979	127117345	9.293e-08	rs10818942
EpiGII2868506Q	chr9	127116979	127117345	9.374e-08	rs2416927
EpiGII2868506Q	chr9	127116979	127117345	9.55e-08	rs4838161
EpiGII2868506Q	chr9	127116979	127117345	3.968e-09	rs2150237
EpiGII2868506Q	chr9	127116979	127117345	8.714e-08	rs10760352
EpiGII2868506Q	chr9	127116979	127117345	4.538e-07	rs2274782
EpiGII2868506Q	chr9	127116979	127117345	1.029e-09	rs2274783
EpiGII2868506Q	chr9	127116979	127117345	4.251e-09	rs3780208
EpiGII2868506Q	chr9	127116979	127117345	3.036e-11	rs867610
EpiGII2868506Q	chr9	127116979	127117345	2.983e-08	rs10818943
EpiGII2868506Q	chr9	127116979	127117345	7.133e-08	rs2068165
EpiGII2868506Q	chr9	127116979	127117345	2.459e-08	rs748741
EpiGII2868506Q	chr9	127116979	127117345	6.305e-08	rs912355
EpiGII2868506Q	chr9	127116979	127117345	6.176e-08	rs4836973
EpiGII2868506Q	chr9	127116979	127117345	5.848e-08	rs3780204
EpiGII2868506Q	chr9	127116979	127117345	3.518e-09	rs10986318
EpiGII2868506Q	chr9	127116979	127117345	1.846e-08	rs12349571
EpiGII2868506Q	chr9	127116979	127117345	1.786e-08	rs10986319
EpiGII2868506Q	chr9	127116979	127117345	1.77e-08	rs10986320
EpiGII2868506Q	chr9	127116979	127117345	1.555e-08	rs1024255
EpiGII2868506Q	chr9	127116979	127117345	1.511e-08	rs753788
EpiGII2868506Q	chr9	127116979	127117345	1.07e-11	rs748661
EpiGII2868506Q	chr9	127116979	127117345	1.003e-11	rs7858491
EpiGII2868506Q	chr9	127116979	127117345	3.002e-11	rs11791290
EpiGII2868506Q	chr9	127116979	127117345	3.384e-11	rs7861933
EpiGII2868506Q	chr9	127116979	127117345	9.501e-12	rs927610
EpiGII2868506Q	chr9	127116979	127117345	3.318e-11	rs7851278
EpiGII2868506Q	chr9	127116979	127117345	9.194e-12	rs10760355
EpiGII2868506Q	chr9	127116979	127117345	3.473e-11	rs7872979
EpiGII2868506Q	chr9	127116979	127117345	3.184e-11	rs3780201
EpiGII2868506Q	chr9	127116979	127117345	8.23e-12	rs1408096
EpiGII2868506Q	chr9	127116979	127117345	9.187e-12	rs2416924
EpiGII2868506Q	chr9	127116979	127117345	2.442e-11	rs7045589
EpiGII2868506Q	chr9	127116979	127117345	3.216e-11	rs7049097
EpiGII2868506Q	chr9	127116979	127117345	4.66e-11	rs2416
EpiGII2868506Q	chr9	127116979	127117345	4.562e-12	rs10818946
EpiGII2868506Q	chr9	127116979	127117345	2.878e-11	rs1323761
EpiGII2868506Q	chr9	127116979	127117345	3.066e-11	rs1330811
EpiGII2868506Q	chr9	127116979	127117345	1.368e-12	rs7857897
EpiGII2868506Q	chr9	127116979	127117345	7.608e-12	rs912353
EpiGII2868506Q	chr9	127116979	127117345	5.836e-11	rs1139641
EpiGII2868506Q	chr9	127116979	127117345	2.772e-11	rs10986324
EpiGII2868506Q	chr9	127116979	127117345	3.398e-09	rs11789637
EpiGII2868506Q	chr9	127116979	127117345	3.083e-12	rs10119911
EpiGII2868506Q	chr9	127116979	127117345	2.653e-11	rs6478658
EpiGII2868506Q	chr9	127116979	127117345	2.584e-11	rs6478659
EpiGII2868506Q	chr9	127116979	127117345	8.883e-12	rs10818950
EpiGII2868506Q	chr9	127116979	127117345	5.816e-12	rs10818951
EpiGII2868506Q	chr9	127116979	127117345	2.589e-11	rs3758207
EpiGII2868506Q	chr9	127116979	127117345	5.966e-09	rs11793963
EpiGII2868506Q	chr9	127116979	127117345	2.654e-11	rs7854989
EpiGII2868506Q	chr9	127116979	127117345	3.401e-11	rs1007185
EpiGII2868506Q	chr9	127116979	127117345	8.165e-12	rs10818952
EpiGII2868506Q	chr9	127116979	127117345	5.739e-12	rs7875898
EpiGII2868506Q	chr9	127116979	127117345	8.866e-12	rs10123514
EpiGII2868506Q	chr9	127116979	127117345	3.578e-11	rs13300918
EpiGII2868506Q	chr9	127116979	127117345	3.178e-11	rs17315546
EpiGII2868506Q	chr9	127116979	127117345	1.877e-11	rs3758206
EpiGII2868506Q	chr9	127116979	127117345	1.951e-11	rs10818957
EpiGII2868506Q	chr9	127116979	127117345	6.695e-11	rs10760356
EpiGII2868506Q	chr9	127116979	127117345	1.92e-06	rs13286252
EpiGII2868506Q	chr9	127116979	127117345	3.141e-07	rs10818960
EpiGII2868506Q	chr9	127116979	127117345	1.071e-08	rs9696974
EpiGII2868506Q	chr9	127116979	127117345	5.924e-11	rs7864941
EpiGII2868506Q	chr9	127116979	127117345	6.684e-11	rs11791153
EpiGII2868506Q	chr9	127116979	127117345	6.828e-11	rs10760358
EpiGII2868506Q	chr9	127116979	127117345	9.865e-11	rs10986332
EpiGII2868506Q	chr9	127116979	127117345	6.207e-11	rs10986333
EpiGII2868506Q	chr9	127116979	127117345	3.412e-10	rs7027515
EpiGII2868506Q	chr9	127116979	127117345	1.031e-10	rs10760359
EpiGII2868506Q	chr9	127116979	127117345	1.241e-10	rs3780198
EpiGII2868506Q	chr9	127116979	127117345	1.807e-10	rs3780197
EpiGII2868506Q	chr9	127116979	127117345	2.417e-10	rs4574
EpiGII2868506Q	chr9	127116979	127117345	6.475e-10	rs2236386
EpiGII2868506Q	chr9	127116979	127117345	6.254e-09	rs10760361
EpiGII2868506Q	chr9	127116979	127117345	6.023e-09	rs10818962
EpiGII2868506Q	chr9	127116979	127117345	3.074e-08	rs12343206
EpiGII2882474Q	chr9	131413221	131413561	1.66e-16	rs10819406
EpiGII2882474Q	chr9	131413221	131413561	1.482e-17	rs945834
EpiGII2882474Q	chr9	131413221	131413561	1.116e-17	rs10760564,rs11790032
EpiGII2882474Q	chr9	131413221	131413561	2.262e-13	9-131322774
EpiGII2882474Q	chr9	131413221	131413561	1.093e-17	rs10988038,rs11789468
EpiGII2882474Q	chr9	131413221	131413561	1.074e-17	rs4506330
EpiGII2882474Q	chr9	131413221	131413561	1.126e-17	rs10819409
EpiGII2882474Q	chr9	131413221	131413561	1.184e-17	rs10819410
EpiGII2882474Q	chr9	131413221	131413561	1.091e-17	rs4837279,rs7047416,rs2297768
EpiGII2882474Q	chr9	131413221	131413561	1.094e-17	rs4395990
EpiGII2882474Q	chr9	131413221	131413561	1.963e-17	rs10988041
EpiGII2882474Q	chr9	131413221	131413561	1.06e-17	rs2152833,rs2297771
EpiGII2882474Q	chr9	131413221	131413561	1.4e-17	rs3763599
EpiGII2882474Q	chr9	131413221	131413561	3.529e-13	rs10988042
EpiGII2882474Q	chr9	131413221	131413561	1.177e-17	rs10988043,rs10819411
EpiGII2882474Q	chr9	131413221	131413561	1.858e-17	rs10988044
EpiGII2882474Q	chr9	131413221	131413561	1.117e-17	rs7042918,rs1890104
EpiGII2882474Q	chr9	131413221	131413561	6.108e-18	rs7043563
EpiGII2882474Q	chr9	131413221	131413561	1.816e-17	rs10988046
EpiGII2882474Q	chr9	131413221	131413561	1.035e-17	rs7027510
EpiGII2882474Q	chr9	131413221	131413561	1.118e-17	rs7046238
EpiGII2882474Q	chr9	131413221	131413561	1.34e-17	rs4837284
EpiGII2882474Q	chr9	131413221	131413561	9.077e-18	rs10988049
EpiGII2882474Q	chr9	131413221	131413561	8.77e-17	rs9695753
EpiGII2882474Q	chr9	131413221	131413561	1.48e-15	rs7867498
EpiGII2882474Q	chr9	131413221	131413561	1.311e-17	rs12339787
EpiGII2882474Q	chr9	131413221	131413561	1.564e-17	rs7870109
EpiGII2882474Q	chr9	131413221	131413561	3.426e-13	rs10819421
EpiGII2882474Q	chr9	131413221	131413561	1.745e-15	rs62586287
EpiGII2882474Q	chr9	131413221	131413561	1.701e-17	rs10988053
EpiGII2882474Q	chr9	131413221	131413561	1.734e-17	rs2227864
EpiGII2882474Q	chr9	131413221	131413561	1.841e-17	9-131363112
EpiGII2882474Q	chr9	131413221	131413561	1.927e-17	rs10819422
EpiGII2882474Q	chr9	131413221	131413561	1.964e-17	rs4837289
EpiGII2882474Q	chr9	131413221	131413561	2.101e-17	rs13302706
EpiGII2882474Q	chr9	131413221	131413561	1.4e-16	rs13302463
EpiGII2882474Q	chr9	131413221	131413561	2.303e-17	rs10988058
EpiGII2882474Q	chr9	131413221	131413561	9.631e-17	rs10819423
EpiGII2882474Q	chr9	131413221	131413561	2.782e-17	rs2227862
EpiGII2882474Q	chr9	131413221	131413561	1.296e-08	rs3750332
EpiGII2882474Q	chr9	131413221	131413561	2.792e-17	rs7864187
EpiGII2882474Q	chr9	131413221	131413561	2.236e-17	rs953666
EpiGII2882474Q	chr9	131413221	131413561	2.804e-17	rs953665
EpiGII2882474Q	chr9	131413221	131413561	2.795e-17	rs10819424
EpiGII2882474Q	chr9	131413221	131413561	4.471e-17	9-131386135
EpiGII2882474Q	chr9	131413221	131413561	2.98e-17	rs3737308
EpiGII2882474Q	chr9	131413221	131413561	3.737e-17	rs10760568
EpiGII2882474Q	chr9	131413221	131413561	3.405e-17	rs7038602
EpiGII2882474Q	chr9	131413221	131413561	7.862e-12	rs1572914
EpiGII2882474Q	chr9	131413221	131413561	9.153e-12	rs7857728
EpiGII2882474Q	chr9	131413221	131413561	2.973e-17	rs2184932
EpiGII2882474Q	chr9	131413221	131413561	7.749e-16	rs4837291
EpiGII2882474Q	chr9	131413221	131413561	9.666e-16	rs10760570
EpiGII2882474Q	chr9	131413221	131413561	9.779e-16	rs10114606
EpiGII2882474Q	chr9	131413221	131413561	1.001e-15	rs945836
EpiGII2882474Q	chr9	131413221	131413561	2.087e-07	9-131401760
EpiGII2882474Q	chr9	131413221	131413561	4.018e-15	9-131401933
EpiGII2882474Q	chr9	131413221	131413561	1.05e-15	rs2298045
EpiGII2882474Q	chr9	131413221	131413561	7.276e-09	rs7045778
EpiGII2882474Q	chr9	131413221	131413561	2.155e-07	rs4397511
EpiGII2882474Q	chr9	131413221	131413561	2.098e-07	rs16936868
EpiGII2882474Q	chr9	131413221	131413561	1.582e-06	9-131409546,rs10988068
EpiGII2882474Q	chr9	131413221	131413561	7.401e-07	rs10988067
EpiGII2882474Q	chr9	131413221	131413561	9.161e-16	rs7036944
EpiGII2882474Q	chr9	131413221	131413561	2.309e-07	rs7037051
EpiGII2882474Q	chr9	131413221	131413561	5.363e-12	rs10760571
EpiGII2882474Q	chr9	131413221	131413561	9.276e-16	rs10819426
EpiGII2882474Q	chr9	131413221	131413561	9.303e-16	rs7862967
EpiGII2882474Q	chr9	131413221	131413561	2.289e-07	rs7849746
EpiGII2882474Q	chr9	131413221	131413561	9.322e-16	rs7036322
EpiGII2882474Q	chr9	131413221	131413561	2.224e-07	rs1572552
EpiGII2882474Q	chr9	131413221	131413561	1.001e-14	rs10819427
EpiGII2882474Q	chr9	131413221	131413561	1.3e-14	rs2185581
EpiGII2882474Q	chr9	131413221	131413561	3.248e-12	rs4836616
EpiGII2946862Q	chr10	62761728	62761920	1.421e-06	10-63101322
EpiGII2946862Q	chr10	62761728	62761920	2.665e-08	10-63146178
EpiGII2946862Q	chr10	62761728	62761920	2.646e-08	10-63149088
EpiGII3042175Q	chr10	27001322	27001477	6.557e-09	rs11015202,rs11015203
EpiGII3042175Q	chr10	27001322	27001477	3.165e-07	rs34814552
EpiGII3042175Q	chr10	27001322	27001477	1.097e-08	rs2489564
EpiGII3042175Q	chr10	27001322	27001477	1.158e-08	rs2477276
EpiGII3042175Q	chr10	27001322	27001477	2.552e-07	rs11015209
EpiGII3042175Q	chr10	27001322	27001477	2.442e-07	rs11015211
EpiGII3042175Q	chr10	27001322	27001477	2.4e-07	rs7902245
EpiGII3042175Q	chr10	27001322	27001477	2.374e-07	rs7905561
EpiGII3042175Q	chr10	27001322	27001477	2.356e-07	rs11015212
EpiGII3042175Q	chr10	27001322	27001477	2.361e-07	rs7896300
EpiGII3042175Q	chr10	27001322	27001477	2.25e-07	rs10829047
EpiGII3042175Q	chr10	27001322	27001477	1.205e-07	10-26961004
EpiGII3042175Q	chr10	27001322	27001477	3.034e-07	rs11015216
EpiGII3042175Q	chr10	27001322	27001477	1.865e-07	rs12761447
EpiGII3042175Q	chr10	27001322	27001477	3.838e-07	rs12246285
EpiGII3042175Q	chr10	27001322	27001477	8.002e-07	rs12246287,rs12260466
EpiGII3042175Q	chr10	27001322	27001477	1.854e-07	rs36006550
EpiGII3042175Q	chr10	27001322	27001477	1.933e-07	rs35687107
EpiGII3042175Q	chr10	27001322	27001477	1.924e-07	rs35827769
EpiGII3042175Q	chr10	27001322	27001477	2.023e-07	rs34901510
EpiGII3042175Q	chr10	27001322	27001477	1.432e-07	rs35841691
EpiGII3042175Q	chr10	27001322	27001477	1.424e-07	rs35534478
EpiGII3042175Q	chr10	27001322	27001477	1.817e-07	rs11015218
EpiGII3042175Q	chr10	27001322	27001477	1.963e-07	rs10829048
EpiGII3042175Q	chr10	27001322	27001477	1.16e-07	rs61841662
EpiGII3042175Q	chr10	27001322	27001477	8.476e-09	rs12415035
EpiGII3042175Q	chr10	27001322	27001477	8.146e-09	rs7100327
EpiGII3042175Q	chr10	27001322	27001477	8.067e-08	rs12771610
EpiGII3042175Q	chr10	27001322	27001477	6.901e-08	rs34957541
EpiGII3042175Q	chr10	27001322	27001477	6.914e-08	rs17669326
EpiGII3042175Q	chr10	27001322	27001477	2.992e-08	rs11015228
EpiGII3042175Q	chr10	27001322	27001477	6.642e-09	rs1809359
EpiGII3042175Q	chr10	27001322	27001477	6.504e-09	rs12254548
EpiGII3042175Q	chr10	27001322	27001477	5.828e-09	rs7896301
EpiGII3042175Q	chr10	27001322	27001477	5.608e-09	10-26988384
EpiGII3042175Q	chr10	27001322	27001477	5.267e-09	10-26988567
EpiGII3042175Q	chr10	27001322	27001477	5.148e-09	rs11015232
EpiGII3042175Q	chr10	27001322	27001477	2.949e-09	rs7904343
EpiGII3042175Q	chr10	27001322	27001477	4.056e-09	rs1960383
EpiGII3042175Q	chr10	27001322	27001477	3.766e-13	rs1780184,rs1748354
EpiGII3042175Q	chr10	27001322	27001477	1.884e-09	rs1780183
EpiGII3042175Q	chr10	27001322	27001477	1.96e-09	rs2477294
EpiGII3042175Q	chr10	27001322	27001477	2.087e-13	rs2477295
EpiGII3042175Q	chr10	27001322	27001477	3.761e-13	rs1748353
EpiGII3042175Q	chr10	27001322	27001477	1.897e-09	rs1780194
EpiGII3042175Q	chr10	27001322	27001477	4.207e-13	rs1677730
EpiGII3042175Q	chr10	27001322	27001477	3.513e-13	rs1748355
EpiGII3042175Q	chr10	27001322	27001477	3.511e-13	rs1780192
EpiGII3042175Q	chr10	27001322	27001477	3.741e-13	rs1748356
EpiGII3042175Q	chr10	27001322	27001477	3.728e-13	rs2448107
EpiGII3042175Q	chr10	27001322	27001477	2.098e-09	rs2477296
EpiGII3042175Q	chr10	27001322	27001477	3.724e-13	rs2489581
EpiGII3042175Q	chr10	27001322	27001477	1.996e-10	rs2477298
EpiGII3042175Q	chr10	27001322	27001477	3.954e-13	rs3121611
EpiGII3042175Q	chr10	27001322	27001477	3.589e-13	rs3118155
EpiGII3042175Q	chr10	27001322	27001477	3.262e-13	rs1677728
EpiGII3042175Q	chr10	27001322	27001477	2.595e-13	rs1780179
EpiGII3042175Q	chr10	27001322	27001477	3.267e-13	rs1748357
EpiGII3042175Q	chr10	27001322	27001477	4.042e-13	rs1780180
EpiGII3042175Q	chr10	27001322	27001477	1.364e-09	rs1748358
EpiGII3042175Q	chr10	27001322	27001477	3.275e-13	rs1780181
EpiGII3042175Q	chr10	27001322	27001477	3.241e-13	rs1780182
EpiGII3042175Q	chr10	27001322	27001477	2.117e-09	10-27002153
EpiGII3042175Q	chr10	27001322	27001477	1.41e-12	rs55910554
EpiGII3042175Q	chr10	27001322	27001477	1.833e-09	rs2489553
EpiGII3042175Q	chr10	27001322	27001477	2.569e-10	rs11015245
EpiGII3042175Q	chr10	27001322	27001477	1.023e-09	rs10764636
EpiGII3042175Q	chr10	27001322	27001477	8.826e-09	rs10764637
EpiGII3042175Q	chr10	27001322	27001477	8.277e-09	rs4749181
EpiGII3042175Q	chr10	27001322	27001477	7.604e-09	rs1780195
EpiGII3042175Q	chr10	27001322	27001477	3.565e-07	rs2477301
EpiGII3042175Q	chr10	27001322	27001477	7.965e-07	rs35382920
EpiGII3042175Q	chr10	27001322	27001477	8.004e-07	rs11015249
EpiGII3042175Q	chr10	27001322	27001477	7.918e-07	rs2927922
EpiGII3042175Q	chr10	27001322	27001477	5.335e-07	rs3004241
EpiGII3054918Q	chr10	30721783	30721962	2.23e-06	rs10826797
EpiGII3054918Q	chr10	30721783	30721962	2.031e-06	rs10763786
EpiGII3054918Q	chr10	30721783	30721962	2.214e-06	rs11008033
EpiGII3054918Q	chr10	30721783	30721962	1.771e-06	rs1536833,rs2183175,rs10763787
EpiGII3054918Q	chr10	30721783	30721962	1.762e-06	rs7898978
EpiGII3054918Q	chr10	30721783	30721962	1.609e-06	rs694346
EpiGII3054918Q	chr10	30721783	30721962	1.787e-06	rs303431
EpiGII3054918Q	chr10	30721783	30721962	1.519e-06	rs17547917
EpiGII3054918Q	chr10	30721783	30721962	2.069e-06	rs658276
EpiGII3054918Q	chr10	30721783	30721962	1.746e-06	rs685319
EpiGII3054918Q	chr10	30721783	30721962	1.742e-06	rs2065723
EpiGII3054918Q	chr10	30721783	30721962	2.124e-06	rs2489842
EpiGII3054918Q	chr10	30721783	30721962	2.308e-06	rs306588
EpiGII3054918Q	chr10	30721783	30721962	1.751e-06	rs303450
EpiGII3054918Q	chr10	30721783	30721962	1.779e-06	rs303449
EpiGII3054918Q	chr10	30721783	30721962	1.689e-06	rs303447
EpiGII3054918Q	chr10	30721783	30721962	2.398e-06	rs303445
EpiGII3054918Q	chr10	30721783	30721962	2.238e-06	rs303435
EpiGII3054918Q	chr10	30721783	30721962	2.32e-06	rs634550
EpiGII3054918Q	chr10	30721783	30721962	3.241e-06	rs648281
EpiGII3054918Q	chr10	30721783	30721962	1.903e-06	rs302423
EpiGII3054918Q	chr10	30721783	30721962	2.464e-06	rs160018
EpiGII3054918Q	chr10	30721783	30721962	2.854e-06	rs160017
EpiGII3054918Q	chr10	30721783	30721962	2.554e-06	rs302425
EpiGII3054918Q	chr10	30721783	30721962	1.942e-06	rs215494
EpiGII3054918Q	chr10	30721783	30721962	1.315e-06	rs103441
EpiGII3082929Q	chr10	128810210	128810641	1.865e-07	rs9418754
EpiGII3082929Q	chr10	128810210	128810641	3.209e-07	rs7083297
EpiGII3082929Q	chr10	128810210	128810641	3.5e-07	rs9418761
EpiGII3082929Q	chr10	128810210	128810641	3.811e-07	rs9418773
EpiGII3082929Q	chr10	128810210	128810641	4e-07	rs17692402
EpiGII3082929Q	chr10	128810210	128810641	4.047e-07	rs9418694
EpiGII3082929Q	chr10	128810210	128810641	4.059e-07	rs9418776
EpiGII3082929Q	chr10	128810210	128810641	3.721e-07	rs9418695
EpiGII3082929Q	chr10	128810210	128810641	4.389e-07	rs9418787
EpiGII3082929Q	chr10	128810210	128810641	2.196e-07	rs9418788,rs1057526,rs1057527
EpiGII3082929Q	chr10	128810210	128810641	4.162e-07	rs9418706
EpiGII3082929Q	chr10	128810210	128810641	3.441e-07	10-128824275
EpiGII3082929Q	chr10	128810210	128810641	3.274e-07	rs9418712
EpiGII3082929Q	chr10	128810210	128810641	3.241e-07	rs9418800
EpiGII3082929Q	chr10	128810210	128810641	3.181e-07	rs11018215
EpiGII3082929Q	chr10	128810210	128810641	3.178e-07	rs4751425
EpiGII3082929Q	chr10	128810210	128810641	3.094e-07	rs9418802
EpiGII3082929Q	chr10	128810210	128810641	2.984e-07	rs35039157
EpiGII3082929Q	chr10	128810210	128810641	2.931e-07	rs9418810
EpiGII3082929Q	chr10	128810210	128810641	2.896e-07	rs9418811
EpiGII3082929Q	chr10	128810210	128810641	2.599e-07	rs2066161
EpiGII3082929Q	chr10	128810210	128810641	2.652e-07	rs2066160
EpiGII3082929Q	chr10	128810210	128810641	2.219e-07	rs4751475
EpiGII3082929Q	chr10	128810210	128810641	3.112e-07	rs4751504
EpiGII3082929Q	chr10	128810210	128810641	5.049e-07	rs9418819
EpiGII3082929Q	chr10	128810210	128810641	5.098e-07	rs9418728
EpiGII3082929Q	chr10	128810210	128810641	5.477e-07	rs9418729
EpiGII3082929Q	chr10	128810210	128810641	5.518e-07	rs9418730
EpiGII3082929Q	chr10	128810210	128810641	7.539e-07	rs9418821
EpiGII3082929Q	chr10	128810210	128810641	7.514e-07	rs4751523
EpiGII3082929Q	chr10	128810210	128810641	7.857e-07	rs4751529
EpiGII3082929Q	chr10	128810210	128810641	7.696e-07	rs9418731
EpiGII3082929Q	chr10	128810210	128810641	7.597e-07	rs2185402
EpiGII3082929Q	chr10	128810210	128810641	7.856e-07	rs9418732
EpiGII3082929Q	chr10	128810210	128810641	7.942e-07	rs9418733
EpiGII3082929Q	chr10	128810210	128810641	7.986e-07	rs12763630
EpiGII3082929Q	chr10	128810210	128810641	8.368e-07	rs1106478
EpiGII3082929Q	chr10	128810210	128810641	8.409e-07	rs11015993
EpiGII3082929Q	chr10	128810210	128810641	9.382e-07	rs9418833
EpiGII3082929Q	chr10	128810210	128810641	1.003e-06	rs9418739
EpiGII3082929Q	chr10	128810210	128810641	8.43e-07	rs4751547
EpiGII3276030Q	chr11	44219361	44219639	1.127e-08	rs7946749
EpiGII3276030Q	chr11	44219361	44219639	8.115e-07	rs4755819
EpiGII3276030Q	chr11	44219361	44219639	8.931e-07	rs10430993
EpiGII3276030Q	chr11	44219361	44219639	2.604e-06	rs7935586
EpiGII3276030Q	chr11	44219361	44219639	2.343e-06	rs7928154
EpiGII3276030Q	chr11	44219361	44219639	2.088e-06	rs1454072
EpiGII3398764Q	chr12	124429995	124430301	2.966e-06	rs10744173
EpiGII3403632Q	chr12	125976178	125976447	3.179e-06	12-125812398
EpiGII3420626Q	chr12	130920696	130920884	1.919e-06	rs34584432
EpiGII3420626Q	chr12	130920696	130920884	3.214e-06	rs35394139
EpiGII3420626Q	chr12	130920696	130920884	3.126e-06	rs11615641
EpiGII3420626Q	chr12	130920696	130920884	1.716e-06	rs11613131
EpiGII3420626Q	chr12	130920696	130920884	2.204e-06	rs11611873
EpiGII3420626Q	chr12	130920696	130920884	2.321e-06	rs12815973
EpiGII3420626Q	chr12	130920696	130920884	2.546e-06	rs12815157
EpiGII3420626Q	chr12	130920696	130920884	2.571e-06	rs2292663
EpiGII3447162AG	chr12	7066611	7066922	1.48e-06	rs11064295
EpiGII3447162AG	chr12	7066611	7066922	1.877e-06	rs12815135
EpiGII3447162AG	chr12	7066611	7066922	9.916e-07	rs11064296
EpiGII3447162AG	chr12	7066611	7066922	6.251e-07	rs55944427
EpiGII3447162AG	chr12	7066611	7066922	1.005e-06	rs61919661
EpiGII3448408Q	chr12	109675029	109675290	1.432e-12	rs3742027
EpiGII3448408Q	chr12	109675029	109675290	7.223e-15	rs2241220,rs759560
EpiGII3449118Q	chr12	109885186	109885349	9.448e-09	12-109854511
EpiGII3449118Q	chr12	109885186	109885349	9.397e-09	12-109866083
EpiGII3449118Q	chr12	109885186	109885349	5.062e-09	12-109871987
EpiGII3449118Q	chr12	109885186	109885349	8.824e-09	12-109885229
EpiGII3449118Q	chr12	109885186	109885349	2.007e-09	rs6606719,rs6606720
EpiGII3449118Q	chr12	109885186	109885349	5.213e-09	rs55816288
EpiGII3449118Q	chr12	109885186	109885349	1.408e-09	12-109891459
EpiGII3449118Q	chr12	109885186	109885349	2.69e-09	rs56406401,12-109904436
EpiGII3449118Q	chr12	109885186	109885349	2.666e-09	12-109901470
EpiGII3449118Q	chr12	109885186	109885349	2.677e-09	12-109905564,12-109907664
EpiGII3449118Q	chr12	109885186	109885349	2.682e-09	12-109908530
EpiGII3449118Q	chr12	109885186	109885349	2.685e-09	rs55990265
EpiGII3449118Q	chr12	109885186	109885349	2.292e-09	12-109915929
EpiGII3449118Q	chr12	109885186	109885349	2.662e-09	rs17181453,12-109944441,rs2287188,rs56330650,rs2241209,rs55980475,12-109975290,12-109977283,12-109982303,12-109993424,rs61940512,12-110026822
EpiGII3449118Q	chr12	109885186	109885349	2.852e-09	12-109938465
EpiGII3449118Q	chr12	109885186	109885349	2.298e-09	rs7311653
EpiGII3449118Q	chr12	109885186	109885349	4.138e-08	12-110042391
EpiGII3449118Q	chr12	109885186	109885349	4.353e-08	12-110043679
EpiGII3449118Q	chr12	109885186	109885349	4.375e-08	rs17608087
EpiGII3449118Q	chr12	109885186	109885349	4.599e-08	12-110045239
EpiGII3449118Q	chr12	109885186	109885349	4.948e-08	rs17608150
EpiGII3449118Q	chr12	109885186	109885349	1.048e-07	rs17670859
EpiGII3449118Q	chr12	109885186	109885349	7.419e-08	rs56269841
EpiGII3449118Q	chr12	109885186	109885349	4.879e-07	rs56248035
EpiGII3449118Q	chr12	109885186	109885349	1.136e-07	12-110055630
EpiGII3449118Q	chr12	109885186	109885349	2.023e-06	12-110062572
EpiGII3449118Q	chr12	109885186	109885349	1.716e-07	12-110068882
EpiGII3449118Q	chr12	109885186	109885349	1.76e-07	rs7484578
EpiGII3449118Q	chr12	109885186	109885349	1.859e-07	12-110074922
EpiGII3449118Q	chr12	109885186	109885349	1.901e-07	12-110076073
EpiGII3449118Q	chr12	109885186	109885349	2.352e-07	rs11067658
EpiGII3619510Q	chr15	41625250	41625595	2.827e-06	15-41323360
EpiGII3619510Q	chr15	41625250	41625595	1.922e-06	15-41327717,15-41335361
EpiGII3619510Q	chr15	41625250	41625595	1.584e-06	rs7172299
EpiGII3619510Q	chr15	41625250	41625595	1.595e-06	rs7173545,rs8038575
EpiGII3619510Q	chr15	41625250	41625595	1.592e-06	rs59500750,15-41432851,rs7172817,15-41475356,15-41475471,15-41563617
EpiGII3619510Q	chr15	41625250	41625595	1.435e-06	rs8039060
EpiGII3619510Q	chr15	41625250	41625595	1.765e-06	rs9745300
EpiGII3619510Q	chr15	41625250	41625595	1.589e-06	15-41431520,rs59441380,rs9672309
EpiGII3619510Q	chr15	41625250	41625595	1.591e-06	15-41431660,15-41503026,15-41503028,15-41503687,15-41503706,15-41503806,15-41503818,15-41563540
EpiGII3619510Q	chr15	41625250	41625595	1.586e-06	rs12324568
EpiGII3619510Q	chr15	41625250	41625595	1.599e-06	15-41434108
EpiGII3619510Q	chr15	41625250	41625595	1.432e-06	rs7168706
EpiGII3619510Q	chr15	41625250	41625595	1.478e-06	rs58322837
EpiGII3619510Q	chr15	41625250	41625595	1.715e-06	rs8040375
EpiGII3619510Q	chr15	41625250	41625595	1.588e-06	rs60789744,15-41490035,15-41490835,rs8025660
EpiGII3619510Q	chr15	41625250	41625595	1.436e-06	rs8026570
EpiGII3619510Q	chr15	41625250	41625595	1.605e-06	15-41441598
EpiGII3619510Q	chr15	41625250	41625595	3.583e-07	15-41443634
EpiGII3619510Q	chr15	41625250	41625595	1.6e-06	rs8029385,rs8029694
EpiGII3619510Q	chr15	41625250	41625595	1.614e-06	15-41447411
EpiGII3619510Q	chr15	41625250	41625595	1.612e-06	15-41448178
EpiGII3619510Q	chr15	41625250	41625595	1.611e-06	15-41449071
EpiGII3619510Q	chr15	41625250	41625595	1.575e-06	rs7173023
EpiGII3619510Q	chr15	41625250	41625595	1.387e-06	15-41451357
EpiGII3619510Q	chr15	41625250	41625595	1.583e-06	15-41456737,rs8038103
EpiGII3619510Q	chr15	41625250	41625595	5.267e-08	15-41456965
EpiGII3619510Q	chr15	41625250	41625595	1.582e-06	rs60311245,rs60699019,rs16971562
EpiGII3619510Q	chr15	41625250	41625595	1.17e-06	rs60365969
EpiGII3619510Q	chr15	41625250	41625595	1.566e-06	rs56815966
EpiGII3619510Q	chr15	41625250	41625595	1.585e-06	15-41460065,15-41460149,rs16971576,15-41464871,15-41465126,15-41480798
EpiGII3619510Q	chr15	41625250	41625595	3.93e-07	15-41465713
EpiGII3619510Q	chr15	41625250	41625595	1.167e-06	15-41502348
EpiGII3619510Q	chr15	41625250	41625595	1.576e-06	rs60461473
EpiGII3619510Q	chr15	41625250	41625595	4.163e-07	15-41503595
EpiGII3619510Q	chr15	41625250	41625595	1.59e-06	15-41504733,15-41505782,15-41506474,15-41506619,15-41507136,rs8030732,rs55787465,rs2412607,rs1402569,rs16971647,15-41510360,15-41510457,rs57009745,rs16971651,rs7165551,rs16971654,rs8030954,rs8030683,rs8030706,rs8030712,15-41512385,rs2090826,15-41512708,rs58851405,rs56262456,rs55952963,15-41514024,15-41514158,15-41514334,15-41515214
EpiGII3619510Q	chr15	41625250	41625595	5.558e-08	rs8034649
EpiGII3619510Q	chr15	41625250	41625595	4.159e-07	15-41505801
EpiGII3619510Q	chr15	41625250	41625595	1.628e-06	15-41505827
EpiGII3619510Q	chr15	41625250	41625595	4.033e-07	15-41506037,15-41506049
EpiGII3619510Q	chr15	41625250	41625595	1.563e-06	15-41506234
EpiGII3619510Q	chr15	41625250	41625595	1.578e-06	15-41506296
EpiGII3619510Q	chr15	41625250	41625595	1.543e-06	15-41507190
EpiGII3619510Q	chr15	41625250	41625595	1.352e-06	15-41507468
EpiGII3619510Q	chr15	41625250	41625595	1.346e-06	15-41507469,rs8025916
EpiGII3619510Q	chr15	41625250	41625595	1.215e-06	15-41507659
EpiGII3619510Q	chr15	41625250	41625595	1.654e-06	rs16971653
EpiGII3619510Q	chr15	41625250	41625595	1.734e-06	15-41512537
EpiGII3619510Q	chr15	41625250	41625595	1.984e-06	rs7167142
EpiGII3619510Q	chr15	41625250	41625595	1.466e-06	rs7166182
EpiGII3619510Q	chr15	41625250	41625595	1.299e-07	rs11070322
EpiGII3619510Q	chr15	41625250	41625595	1.596e-06	rs58060180
EpiGII3619510Q	chr15	41625250	41625595	1.601e-06	rs58436082
EpiGII3619510Q	chr15	41625250	41625595	1.647e-06	15-41526022
EpiGII3619510Q	chr15	41625250	41625595	1.655e-06	rs2083238
EpiGII3619510Q	chr15	41625250	41625595	1.465e-06	rs16952331
EpiGII3619510Q	chr15	41625250	41625595	1.689e-06	15-41535206
EpiGII3619510Q	chr15	41625250	41625595	1.721e-06	15-41540924
EpiGII3619510Q	chr15	41625250	41625595	1.778e-06	15-41547130
EpiGII3619510Q	chr15	41625250	41625595	1.802e-06	rs8031542
EpiGII3619510Q	chr15	41625250	41625595	1.827e-06	15-41554311,15-41554569
EpiGII3619510Q	chr15	41625250	41625595	1.845e-06	15-41554587
EpiGII3619510Q	chr15	41625250	41625595	1.442e-06	15-41557433
EpiGII3619510Q	chr15	41625250	41625595	1.447e-06	rs2899014
EpiGII3619510Q	chr15	41625250	41625595	1.445e-06	rs2412610
EpiGII3619510Q	chr15	41625250	41625595	1.645e-06	15-41561914
EpiGII3619510Q	chr15	41625250	41625595	1.884e-06	rs16971734
EpiGII3619510Q	chr15	41625250	41625595	1.572e-06	15-41563308
EpiGII3619510Q	chr15	41625250	41625595	1.661e-06	15-41564507
EpiGII3619510Q	chr15	41625250	41625595	1.674e-06	15-41564989
EpiGII3619510Q	chr15	41625250	41625595	1.897e-06	15-41568390
EpiGII3619510Q	chr15	41625250	41625595	2.055e-06	rs9972547
EpiGII3619510Q	chr15	41625250	41625595	2.013e-06	rs28639784
EpiGII3619510Q	chr15	41625250	41625595	1.872e-06	15-41574578
EpiGII3619510Q	chr15	41625250	41625595	2.084e-06	15-41576159
EpiGII3619510Q	chr15	41625250	41625595	2.082e-06	15-41579419
EpiGII3619510Q	chr15	41625250	41625595	2.104e-06	15-41583188,rs8023619
EpiGII3619510Q	chr15	41625250	41625595	2.103e-06	rs7167498
EpiGII3619510Q	chr15	41625250	41625595	2.124e-06	15-41588293
EpiGII3619510Q	chr15	41625250	41625595	2.132e-06	15-41589667
EpiGII3619510Q	chr15	41625250	41625595	1.147e-06	15-41589906
EpiGII3619510Q	chr15	41625250	41625595	2.166e-06	15-41591475
EpiGII3619510Q	chr15	41625250	41625595	1.96e-06	rs28643296
EpiGII3619510Q	chr15	41625250	41625595	2.184e-06	rs10467974
EpiGII3619510Q	chr15	41625250	41625595	2.19e-06	15-41600323
EpiGII3619510Q	chr15	41625250	41625595	3.049e-06	15-41608966
EpiGII3619510Q	chr15	41625250	41625595	2.791e-06	15-41609333,rs7175800,rs7175690,15-41614871,15-41616676,15-41618746,15-41622199,rs61127691,rs58910172,rs10518718,15-41625650,rs58335029
EpiGII3619510Q	chr15	41625250	41625595	5.187e-08	rs7183337
EpiGII3619510Q	chr15	41625250	41625595	2.796e-06	15-41636661
EpiGII3619510Q	chr15	41625250	41625595	2.84e-06	15-41640005
EpiGII3619510Q	chr15	41625250	41625595	1.604e-06	15-41649880
EpiGII3619510Q	chr15	41625250	41625595	2.618e-06	rs12324291
EpiGII3619510Q	chr15	41625250	41625595	2.935e-06	15-41659329,15-41659364,15-41660366,15-41661819,rs9672866,rs10152497,15-41679717,rs28393472,15-41694199
EpiGII3619510Q	chr15	41625250	41625595	2.263e-06	15-41659641
EpiGII3619510Q	chr15	41625250	41625595	2.944e-06	15-41700432,rs16971806
EpiGII3619510Q	chr15	41625250	41625595	2.757e-06	rs7172148,15-41720543,15-41722304,15-41722853,15-41724690,15-41725677,15-41725796,15-41731360,15-41741679,rs28847691,15-41756912,15-41759002,15-41759157,15-41772016,15-41773741
EpiGII3619510Q	chr15	41625250	41625595	2.735e-06	15-41723167
EpiGII3619510Q	chr15	41625250	41625595	2.783e-06	15-41725367
EpiGII3619510Q	chr15	41625250	41625595	1.433e-07	15-41734439
EpiGII3619510Q	chr15	41625250	41625595	1.403e-07	rs28655070
EpiGII3619510Q	chr15	41625250	41625595	3.117e-06	rs16971832
EpiGII3619510Q	chr15	41625250	41625595	2.761e-06	rs16971834
EpiGII3619510Q	chr15	41625250	41625595	2.419e-06	15-41777736
EpiGII3752536Q	chr15	80537394	80537590	6.409e-09	15-80341682
EpiGII3752536Q	chr15	80537394	80537590	7.777e-07	rs12902844,15-80372283
EpiGII3752536Q	chr15	80537394	80537590	8.059e-07	rs12899145
EpiGII3752536Q	chr15	80537394	80537590	7.915e-07	rs36024963
EpiGII3752536Q	chr15	80537394	80537590	8.334e-07	rs35689309
EpiGII3752536Q	chr15	80537394	80537590	7.753e-07	rs34595006
EpiGII3752536Q	chr15	80537394	80537590	7.704e-07	rs16971695
EpiGII3752536Q	chr15	80537394	80537590	7.834e-07	rs12914303
EpiGII3752536Q	chr15	80537394	80537590	7.714e-07	rs7166509
EpiGII3752536Q	chr15	80537394	80537590	7.645e-07	rs8026715
EpiGII3752536Q	chr15	80537394	80537590	7.698e-07	rs12594534
EpiGII3752536Q	chr15	80537394	80537590	7.658e-07	rs12591712
EpiGII3752536Q	chr15	80537394	80537590	7.622e-07	rs16971725
EpiGII3752536Q	chr15	80537394	80537590	7.635e-07	rs35047470,rs12591468,rs34431711
EpiGII3752536Q	chr15	80537394	80537590	7.848e-07	15-80401475
EpiGII3752536Q	chr15	80537394	80537590	7.602e-07	rs10519281
EpiGII3752536Q	chr15	80537394	80537590	7.601e-07	rs12915043,rs8035077,rs34008123
EpiGII3752536Q	chr15	80537394	80537590	7.558e-07	15-80418513
EpiGII3752536Q	chr15	80537394	80537590	7.652e-07	rs12902696
EpiGII3752536Q	chr15	80537394	80537590	7.503e-07	rs34345531
EpiGII3752536Q	chr15	80537394	80537590	2.072e-06	rs35088180
EpiGII3781050Q	chr15	91016890	91017186	1.926e-06	15-91316878
EpiGII3781050Q	chr15	91016890	91017186	2.065e-06	15-91319246
EpiGII3781050Q	chr15	91016890	91017186	2.135e-06	rs7164724
EpiGII3781050Q	chr15	91016890	91017186	2.143e-06	15-91321482
EpiGII3781050Q	chr15	91016890	91017186	1.782e-06	15-91321603
EpiGII3781050Q	chr15	91016890	91017186	2.142e-06	15-91321781
EpiGII3781050Q	chr15	91016890	91017186	2.173e-06	rs28385050
EpiGII3781050Q	chr15	91016890	91017186	2.181e-06	rs28385056
EpiGII3781050Q	chr15	91016890	91017186	2.208e-06	rs28385062
EpiGII3781050Q	chr15	91016890	91017186	2.227e-06	rs28745031,15-91329566
EpiGII3781050Q	chr15	91016890	91017186	2.269e-06	rs28745032
EpiGII3781050Q	chr15	91016890	91017186	2.174e-06	rs28745034,15-91335073
EpiGII3781050Q	chr15	91016890	91017186	1.81e-06	15-91330436
EpiGII3781050Q	chr15	91016890	91017186	2.224e-06	15-91330983
EpiGII3781050Q	chr15	91016890	91017186	2.234e-06	15-91332189
EpiGII3781050Q	chr15	91016890	91017186	2.362e-06	rs8026723
EpiGII3781050Q	chr15	91016890	91017186	2.358e-06	rs17273528
EpiGII3781050Q	chr15	91016890	91017186	2.414e-06	15-91336265
EpiGII3781050Q	chr15	91016890	91017186	2.377e-06	15-91336298
EpiGII3781050Q	chr15	91016890	91017186	2.031e-06	15-91336351
EpiGII3781050Q	chr15	91016890	91017186	2.419e-06	rs28385090
EpiGII3781050Q	chr15	91016890	91017186	2.994e-06	rs28385093,rs28385094
EpiGII3781050Q	chr15	91016890	91017186	3.003e-06	rs28385095,rs28385096
EpiGII3781050Q	chr15	91016890	91017186	2.36e-06	rs28385099
EpiGII3781050Q	chr15	91016890	91017186	2.385e-06	rs2227933,rs28385106
EpiGII3781050Q	chr15	91016890	91017186	2.39e-06	rs28385109
EpiGII3781050Q	chr15	91016890	91017186	1.368e-06	rs28385111
EpiGII3781050Q	chr15	91016890	91017186	2.403e-06	rs28385112,rs28385125
EpiGII3781050Q	chr15	91016890	91017186	2.408e-06	15-91340251
EpiGII3781050Q	chr15	91016890	91017186	2.396e-06	15-91340331
EpiGII3781050Q	chr15	91016890	91017186	3.151e-06	15-91340472
EpiGII3781050Q	chr15	91016890	91017186	2.245e-06	15-91340493
EpiGII3781050Q	chr15	91016890	91017186	2.766e-06	rs8031049
EpiGII3781050Q	chr15	91016890	91017186	4.796e-07	rs3213195
EpiGII3781050Q	chr15	91016890	91017186	2.394e-06	rs17273842
EpiGII3781050Q	chr15	91016890	91017186	1.884e-06	15-91341993
EpiGII3781050Q	chr15	91016890	91017186	4.249e-07	rs7177900
EpiGII3781050Q	chr15	91016890	91017186	2.398e-06	rs7182692
EpiGII3781050Q	chr15	91016890	91017186	3.256e-06	rs7165074
EpiGII3781050Q	chr15	91016890	91017186	1.903e-06	rs17273891
EpiGII3781050Q	chr15	91016890	91017186	2.416e-06	15-91343636
EpiGII3781050Q	chr15	91016890	91017186	2.81e-06	15-91343688
EpiGII3781050Q	chr15	91016890	91017186	2.853e-06	15-91343734
EpiGII3781050Q	chr15	91016890	91017186	2.777e-06	15-91343803
EpiGII3781050Q	chr15	91016890	91017186	2.904e-06	15-91343942
EpiGII3781050Q	chr15	91016890	91017186	2.426e-06	rs17273905,15-91344175,15-91344246,15-91344287,rs7182287,rs7162087,rs7162199,rs28385130,rs28385131,rs17274032,rs28385136
EpiGII3781050Q	chr15	91016890	91017186	2.406e-06	rs28385129
EpiGII3781050Q	chr15	91016890	91017186	2.675e-06	rs28385132
EpiGII3781050Q	chr15	91016890	91017186	2.273e-06	rs28385135
EpiGII3781050Q	chr15	91016890	91017186	2.449e-06	rs28385139
EpiGII3781050Q	chr15	91016890	91017186	2.528e-06	rs28745035
EpiGII3781050Q	chr15	91016890	91017186	2.46e-06	rs28745040
EpiGII3781050Q	chr15	91016890	91017186	1.96e-06	rs28385143
EpiGII3781050Q	chr15	91016890	91017186	1.979e-06	15-91348768
EpiGII3781050Q	chr15	91016890	91017186	3.054e-06	15-91349061
EpiGII3781050Q	chr15	91016890	91017186	2.625e-06	rs2283450
EpiGII3781050Q	chr15	91016890	91017186	2.925e-06	15-91349726
EpiGII3781050Q	chr15	91016890	91017186	2.555e-06	rs17274116
EpiGII3781050Q	chr15	91016890	91017186	2.618e-06	rs2270131
EpiGII3781050Q	chr15	91016890	91017186	2.54e-06	rs9282612
EpiGII3781050Q	chr15	91016890	91017186	1.733e-06	rs2073919
EpiGII3781050Q	chr15	91016890	91017186	2.443e-06	rs1063147
EpiGII3781050Q	chr15	91016890	91017186	2.453e-06	rs17183237
EpiGII3781050Q	chr15	91016890	91017186	2.483e-06	rs17183344
EpiGII3781050Q	chr15	91016890	91017186	2.415e-06	rs2239292
EpiGII3781050Q	chr15	91016890	91017186	2.834e-06	rs17274947
EpiGII3811572Q	chr16	8954289	8954493	1.88e-10	rs41305755
EpiGII3811572Q	chr16	8954289	8954493	1.845e-10	rs45545237
EpiGII3811572Q	chr16	8954289	8954493	1.299e-06	rs2270289
EpiGII3811572Q	chr16	8954289	8954493	6.312e-07	rs45515994,rs45615432
EpiGII3811572Q	chr16	8954289	8954493	6.263e-07	rs9456
EpiGII3811572Q	chr16	8954289	8954493	6.288e-07	rs8275
EpiGII3811572Q	chr16	8954289	8954493	6.098e-07	16-8879192
EpiGII3811572Q	chr16	8954289	8954493	7.059e-07	16-8879762
EpiGII3811572Q	chr16	8954289	8954493	7.073e-07	rs11861249
EpiGII3811572Q	chr16	8954289	8954493	7.816e-07	16-8882837
EpiGII3811572Q	chr16	8954289	8954493	7.608e-07	16-8883683
EpiGII3811572Q	chr16	8954289	8954493	7.672e-07	rs3743812
EpiGII3811572Q	chr16	8954289	8954493	7.815e-07	rs16964479
EpiGII3811572Q	chr16	8954289	8954493	6.506e-07	rs6498096
EpiGII3811572Q	chr16	8954289	8954493	7.956e-07	rs3760026
EpiGII3811572Q	chr16	8954289	8954493	1.745e-06	rs3760025
EpiGII3811572Q	chr16	8954289	8954493	1.778e-06	rs3760024
EpiGII3811572Q	chr16	8954289	8954493	9.862e-07	rs3760023
EpiGII3811572Q	chr16	8954289	8954493	2.388e-06	rs9939787
EpiGII3811572Q	chr16	8954289	8954493	1.199e-06	rs62033463
EpiGII3811572Q	chr16	8954289	8954493	2.578e-06	rs4302031
EpiGII3811572Q	chr16	8954289	8954493	6.665e-07	rs60054194
EpiGII3811572Q	chr16	8954289	8954493	5.842e-07	rs4638572
EpiGII3811572Q	chr16	8954289	8954493	5.515e-07	rs4485369
EpiGII3811572Q	chr16	8954289	8954493	6.997e-07	rs11865562
EpiGII3811572Q	chr16	8954289	8954493	2.276e-08	16-8930264
EpiGII3811572Q	chr16	8954289	8954493	1.306e-07	16-8931027
EpiGII3811572Q	chr16	8954289	8954493	5.514e-07	16-8932128
EpiGII3811572Q	chr16	8954289	8954493	1.883e-07	rs4985052
EpiGII3811572Q	chr16	8954289	8954493	3.2e-07	16-8935915
EpiGII3811572Q	chr16	8954289	8954493	1.889e-07	16-8936800
EpiGII3811572Q	chr16	8954289	8954493	2.15e-10	16-8936942
EpiGII3811572Q	chr16	8954289	8954493	1.884e-07	16-8937012
EpiGII3811572Q	chr16	8954289	8954493	2.366e-07	rs12596623
EpiGII3811572Q	chr16	8954289	8954493	1.925e-07	rs11861640
EpiGII3811572Q	chr16	8954289	8954493	6.046e-09	rs9929822
EpiGII3811572Q	chr16	8954289	8954493	1.926e-07	16-8939302
EpiGII3811572Q	chr16	8954289	8954493	1.932e-07	16-8940456
EpiGII3811572Q	chr16	8954289	8954493	1.617e-08	rs4550444
EpiGII3811572Q	chr16	8954289	8954493	1.618e-08	rs4349143
EpiGII3811572Q	chr16	8954289	8954493	1.963e-07	rs11861671
EpiGII3811572Q	chr16	8954289	8954493	1.9e-07	rs11554040
EpiGII3811572Q	chr16	8954289	8954493	6.966e-07	rs4985053
EpiGII3811572Q	chr16	8954289	8954493	2.03e-07	16-8943658
EpiGII3811572Q	chr16	8954289	8954493	4.581e-07	rs11647175
EpiGII3811572Q	chr16	8954289	8954493	1.807e-06	rs11647271
EpiGII3811572Q	chr16	8954289	8954493	5.766e-07	rs9939152
EpiGII3811572Q	chr16	8954289	8954493	2.256e-07	rs7187215
EpiGII3811572Q	chr16	8954289	8954493	4.445e-07	rs7192458
EpiGII3811572Q	chr16	8954289	8954493	5.107e-07	rs2053207
EpiGII3811572Q	chr16	8954289	8954493	3.037e-07	rs3785172,rs3785173
EpiGII3811572Q	chr16	8954289	8954493	4.126e-07	rs4985055
EpiGII3811572Q	chr16	8954289	8954493	2.287e-08	rs1677484
EpiGII3811572Q	chr16	8954289	8954493	9.046e-09	rs1657072
EpiGII3811572Q	chr16	8954289	8954493	1.152e-08	16-8954940
EpiGII384317Q	chr2	234228968	234229357	1.563e-06	rs3828307
EpiGII384317Q	chr2	234228968	234229357	1.328e-06	rs6431322
EpiGII384317Q	chr2	234228968	234229357	1.389e-06	rs57592542
EpiGII384317Q	chr2	234228968	234229357	1.503e-06	2-234248547
EpiGII384317Q	chr2	234228968	234229357	8.111e-07	rs56121794
EpiGII3947657Q	chr16	71382591	71382874	3.023e-06	16-71095249
EpiGII3947657Q	chr16	71382591	71382874	1.547e-06	rs12149588
EpiGII3947657Q	chr16	71382591	71382874	5.245e-07	rs11647627
EpiGII3947657Q	chr16	71382591	71382874	1.223e-07	rs3114634
EpiGII3947657Q	chr16	71382591	71382874	1.976e-06	rs1859088
EpiGII3947657Q	chr16	71382591	71382874	5.236e-07	rs9939485
EpiGII3947657Q	chr16	71382591	71382874	8.023e-08	rs3785347
EpiGII3947657Q	chr16	71382591	71382874	8.629e-08	rs2015813,rs235990,rs235986,rs236008
EpiGII3947657Q	chr16	71382591	71382874	8.67e-08	rs12927616
EpiGII3947657Q	chr16	71382591	71382874	1.404e-08	rs446245
EpiGII3947657Q	chr16	71382591	71382874	8.564e-08	rs235989
EpiGII3947657Q	chr16	71382591	71382874	8.62e-08	rs236009
EpiGII3947657Q	chr16	71382591	71382874	8.342e-08	rs236007
EpiGII3947657Q	chr16	71382591	71382874	3.439e-08	rs236005
EpiGII3947657Q	chr16	71382591	71382874	1.159e-07	rs236003
EpiGII3947657Q	chr16	71382591	71382874	1.072e-07	rs146873
EpiGII3947657Q	chr16	71382591	71382874	1.144e-07	rs235998
EpiGII3947657Q	chr16	71382591	71382874	2.555e-07	rs235995
EpiGII3947657Q	chr16	71382591	71382874	2.065e-08	rs235992
EpiGII3947657Q	chr16	71382591	71382874	2.077e-08	rs434108
EpiGII3947657Q	chr16	71382591	71382874	2.088e-08	rs3094446
EpiGII3947657Q	chr16	71382591	71382874	2.103e-08	rs236016
EpiGII3947657Q	chr16	71382591	71382874	2.123e-08	rs184647
EpiGII3947657Q	chr16	71382591	71382874	2.696e-08	rs171016,rs236015
EpiGII3947657Q	chr16	71382591	71382874	2.124e-08	rs236014
EpiGII3947657Q	chr16	71382591	71382874	2.046e-08	rs3114641
EpiGII3947657Q	chr16	71382591	71382874	2.129e-08	rs173128
EpiGII3947657Q	chr16	71382591	71382874	2.17e-08	rs430445
EpiGII3947657Q	chr16	71382591	71382874	8.632e-09	rs236011
EpiGII3947657Q	chr16	71382591	71382874	2.54e-08	rs370875
EpiGII3947657Q	chr16	71382591	71382874	8.916e-09	rs443889,rs11648802,rs11645087
EpiGII3947657Q	chr16	71382591	71382874	8.334e-09	rs34399179
EpiGII3947657Q	chr16	71382591	71382874	8.34e-09	rs35157832
EpiGII3947657Q	chr16	71382591	71382874	9.213e-09	rs35794600
EpiGII3947657Q	chr16	71382591	71382874	1.633e-09	rs34036373
EpiGII3947657Q	chr16	71382591	71382874	8.276e-09	rs17270785
EpiGII3947657Q	chr16	71382591	71382874	8.275e-09	rs12924136
EpiGII3947657Q	chr16	71382591	71382874	8.293e-09	rs34364189
EpiGII3947657Q	chr16	71382591	71382874	8.302e-09	16-71331588
EpiGII3947657Q	chr16	71382591	71382874	9.897e-08	rs16971009
EpiGII3947657Q	chr16	71382591	71382874	2.4e-08	rs1895529
EpiGII3947657Q	chr16	71382591	71382874	8.285e-09	rs11640386
EpiGII3947657Q	chr16	71382591	71382874	9.425e-09	rs12599316
EpiGII3947657Q	chr16	71382591	71382874	7.547e-09	rs11643119
EpiGII3947657Q	chr16	71382591	71382874	7.958e-09	rs11643128
EpiGII3947657Q	chr16	71382591	71382874	6.985e-09	rs1834044
EpiGII3947657Q	chr16	71382591	71382874	7.494e-09	16-71339094
EpiGII3947657Q	chr16	71382591	71382874	2.505e-07	rs35269005
EpiGII3947657Q	chr16	71382591	71382874	8.167e-09	rs12924913
EpiGII3947657Q	chr16	71382591	71382874	1.54e-08	rs34139169
EpiGII3947657Q	chr16	71382591	71382874	8.131e-09	16-71342713
EpiGII3947657Q	chr16	71382591	71382874	1.527e-08	16-71345348
EpiGII3947657Q	chr16	71382591	71382874	7.97e-09	16-71345781
EpiGII3947657Q	chr16	71382591	71382874	7.966e-09	rs35897488
EpiGII3947657Q	chr16	71382591	71382874	7.999e-09	rs34907542
EpiGII3947657Q	chr16	71382591	71382874	7.913e-09	rs11646754,rs35952792
EpiGII3947657Q	chr16	71382591	71382874	9.42e-07	rs6499500
EpiGII3947657Q	chr16	71382591	71382874	7.83e-09	rs12926365
EpiGII3947657Q	chr16	71382591	71382874	1.282e-07	rs6499502
EpiGII3947657Q	chr16	71382591	71382874	8.122e-09	rs35877499
EpiGII3947657Q	chr16	71382591	71382874	1.534e-07	rs11643673
EpiGII3947657Q	chr16	71382591	71382874	2.334e-06	16-71367987
EpiGII3947657Q	chr16	71382591	71382874	2.39e-06	rs35052014
EpiGII3947657Q	chr16	71382591	71382874	2.407e-06	rs34538430
EpiGII3947657Q	chr16	71382591	71382874	1.279e-08	rs35009583
EpiGII3947657Q	chr16	71382591	71382874	1.736e-10	rs10459795
EpiGII3947657Q	chr16	71382591	71382874	2.275e-09	16-71375712
EpiGII3947657Q	chr16	71382591	71382874	2.32e-06	16-71378744
EpiGII3947657Q	chr16	71382591	71382874	2.325e-06	rs17343100
EpiGII3947657Q	chr16	71382591	71382874	9.122e-10	rs57796453
EpiGII3947657Q	chr16	71382591	71382874	2.086e-06	rs35635213
EpiGII3947657Q	chr16	71382591	71382874	2.08e-06	rs11642316
EpiGII3947657Q	chr16	71382591	71382874	2.055e-06	rs35839403
EpiGII3947657Q	chr16	71382591	71382874	3.13e-08	rs2016583
EpiGII3947657Q	chr16	71382591	71382874	9.972e-09	rs34544064
EpiGII3947657Q	chr16	71382591	71382874	1.075e-06	rs1862818
EpiGII3964139Q	chr16	50827428	50827594	1.348e-10	rs17222902
EpiGII3964139Q	chr16	50827428	50827594	1.331e-10	rs1420871
EpiGII3964139Q	chr16	50827428	50827594	1.138e-10	16-50817489
EpiGII3964139Q	chr16	50827428	50827594	1.184e-10	rs17223257
EpiGII3964139Q	chr16	50827428	50827594	9.495e-11	16-50824911
EpiGII3964139Q	chr16	50827428	50827594	1.083e-10	rs2066852
EpiGII3964139Q	chr16	50827428	50827594	1.288e-10	rs17314948
EpiGII3964139Q	chr16	50827428	50827594	1.314e-10	16-50836309
EpiGII3964139Q	chr16	50827428	50827594	1.256e-10	rs17223592
EpiGII3964139Q	chr16	50827428	50827594	1.492e-10	rs11866769
EpiGII3969104Q	chr16	89814984	89815216	7.01e-07	rs383027
EpiGII3969104Q	chr16	89814984	89815216	6.984e-07	rs453528
EpiGII3969104Q	chr16	89814984	89815216	1.556e-06	rs2162943
EpiGII3969104Q	chr16	89814984	89815216	1.549e-06	rs2115400
EpiGII3969104Q	chr16	89814984	89815216	1.617e-06	rs1045814
EpiGII3969104Q	chr16	89814984	89815216	1.571e-06	rs4247353
EpiGII3969104Q	chr16	89814984	89815216	1.505e-06	rs3751696
EpiGII3969104Q	chr16	89814984	89815216	1.046e-07	rs34133162
EpiGII3969104Q	chr16	89814984	89815216	1.02e-08	rs56283750
EpiGII3969104Q	chr16	89814984	89815216	8.24e-09	rs6500437
EpiGII3969104Q	chr16	89814984	89815216	1.658e-08	rs7189711
EpiGII3969104Q	chr16	89814984	89815216	1.554e-08	rs12051515
EpiGII3969104Q	chr16	89814984	89815216	4.949e-08	rs9941108
EpiGII3969104Q	chr16	89814984	89815216	3.002e-08	rs4785591,rs4785592
EpiGII3969104Q	chr16	89814984	89815216	2.917e-08	rs4785711
EpiGII3969104Q	chr16	89814984	89815216	2.901e-08	rs4785712
EpiGII3969104Q	chr16	89814984	89815216	3.239e-08	rs4785713
EpiGII3969104Q	chr16	89814984	89815216	1.07e-08	rs4785715,rs1007931
EpiGII3969104Q	chr16	89814984	89815216	1.718e-08	rs2003522
EpiGII3969104Q	chr16	89814984	89815216	1.866e-08	rs1961556
EpiGII3969104Q	chr16	89814984	89815216	1.371e-06	rs1230
EpiGII3969104Q	chr16	89814984	89815216	2.078e-08	rs1061646
EpiGII3969104Q	chr16	89814984	89815216	1.092e-06	rs7195906
EpiGII3969104Q	chr16	89814984	89815216	1.396e-06	rs6500439
EpiGII3969104Q	chr16	89814984	89815216	2.795e-08	rs12445480
EpiGII3969104Q	chr16	89814984	89815216	2.73e-08	rs12445695
EpiGII3969104Q	chr16	89814984	89815216	1.543e-06	rs9923733
EpiGII3969104Q	chr16	89814984	89815216	7.416e-08	rs4785718
EpiGII3969104Q	chr16	89814984	89815216	2.143e-06	rs12922302
EpiGII3969104Q	chr16	89814984	89815216	1.801e-06	rs12102290
EpiGII3969104Q	chr16	89814984	89815216	1.798e-06	rs12102297
EpiGII3969104Q	chr16	89814984	89815216	1.711e-06	rs2003520
EpiGII3969104Q	chr16	89814984	89815216	2.459e-06	rs4420527
EpiGII3969104Q	chr16	89814984	89815216	3.226e-08	rs2011877
EpiGII3969104Q	chr16	89814984	89815216	2.915e-08	rs1800345
EpiGII3969104Q	chr16	89814984	89815216	2.612e-08	rs8044026
EpiGII3969104Q	chr16	89814984	89815216	1.811e-08	rs2377043
EpiGII3969104Q	chr16	89814984	89815216	2.968e-07	rs3743861
EpiGII3969104Q	chr16	89814984	89815216	3.118e-07	rs3743860
EpiGII3969104Q	chr16	89814984	89815216	3.525e-08	rs7205518
EpiGII3969104Q	chr16	89814984	89815216	5.495e-09	rs7203255
EpiGII3969104Q	chr16	89814984	89815216	5.268e-09	rs7203281
EpiGII3969104Q	chr16	89814984	89815216	5.039e-09	rs7205519
EpiGII3969104Q	chr16	89814984	89815216	5.436e-09	rs7203511
EpiGII3969104Q	chr16	89814984	89815216	3.513e-08	rs7206120
EpiGII3969104Q	chr16	89814984	89815216	1.18e-08	rs7206308
EpiGII3969104Q	chr16	89814984	89815216	1.178e-08	rs7205604
EpiGII3969104Q	chr16	89814984	89815216	4.114e-07	rs7206721
EpiGII3969104Q	chr16	89814984	89815216	1.339e-08	rs7205993
EpiGII3969104Q	chr16	89814984	89815216	1.642e-08	rs7195752
EpiGII3969104Q	chr16	89814984	89815216	1.572e-08	rs7201028
EpiGII3969104Q	chr16	89814984	89815216	3.212e-08	rs4490003
EpiGII3969104Q	chr16	89814984	89815216	1.524e-08	rs3785280
EpiGII3969104Q	chr16	89814984	89815216	3.001e-08	rs3819567
EpiGII3969104Q	chr16	89814984	89815216	3.184e-08	rs3819568
EpiGII3969104Q	chr16	89814984	89815216	1.39e-08	rs4785720,rs2376885
EpiGII3969104Q	chr16	89814984	89815216	2.673e-06	rs6500441
EpiGII3969104Q	chr16	89814984	89815216	3.151e-06	rs6500442
EpiGII3969104Q	chr16	89814984	89815216	1.031e-08	rs9806894
EpiGII3969104Q	chr16	89814984	89815216	2.672e-06	rs12447465
EpiGII3969104Q	chr16	89814984	89815216	8.62e-09	rs12925427
EpiGII3969104Q	chr16	89814984	89815216	1.122e-08	rs12929831
EpiGII3969104Q	chr16	89814984	89815216	1.167e-08	rs2159113
EpiGII3969104Q	chr16	89814984	89815216	2.492e-08	rs2376880
EpiGII3969104Q	chr16	89814984	89815216	1.026e-06	rs7498439
EpiGII3969104Q	chr16	89814984	89815216	3.252e-06	rs8055825
EpiGII3969104Q	chr16	89814984	89815216	1.015e-08	rs8061447
EpiGII3969104Q	chr16	89814984	89815216	3.122e-06	rs7203907
EpiGII3969104Q	chr16	89814984	89815216	2.35e-08	rs6500444
EpiGII3969104Q	chr16	89814984	89815216	2.978e-06	rs6500445
EpiGII3969104Q	chr16	89814984	89815216	1.709e-08	rs11860203
EpiGII3969104Q	chr16	89814984	89815216	2.511e-08	rs1974583
EpiGII3969104Q	chr16	89814984	89815216	5.008e-08	rs1010356
EpiGII3969104Q	chr16	89814984	89815216	3.307e-06	rs4785595
EpiGII3969104Q	chr16	89814984	89815216	1.196e-08	rs1800340
EpiGII3969104Q	chr16	89814984	89815216	3.379e-06	rs12599180
EpiGII3969104Q	chr16	89814984	89815216	2.461e-08	rs3785276
EpiGII3969104Q	chr16	89814984	89815216	2.738e-08	rs3785275
EpiGII3969104Q	chr16	89814984	89815216	2.536e-08	rs1974572
EpiGII3969104Q	chr16	89814984	89815216	2.468e-08	rs1974571
EpiGII3969104Q	chr16	89814984	89815216	1.799e-08	rs1006547
EpiGII3969104Q	chr16	89814984	89815216	2.375e-08	rs2016571
EpiGII3969104Q	chr16	89814984	89815216	8.41e-09	rs7187436
EpiGII3969104Q	chr16	89814984	89815216	2.753e-06	rs3743859
EpiGII3969104Q	chr16	89814984	89815216	8.262e-09	rs7198982
EpiGII3969104Q	chr16	89814984	89815216	2.782e-06	rs9939756
EpiGII3969104Q	chr16	89814984	89815216	4.466e-07	rs7201321
EpiGII3969104Q	chr16	89814984	89815216	2.451e-06	rs6500446
EpiGII3969104Q	chr16	89814984	89815216	1.328e-08	rs2239360
EpiGII3969104Q	chr16	89814984	89815216	2.85e-06	rs12448860
EpiGII3969104Q	chr16	89814984	89815216	8.996e-09	rs12928089
EpiGII3969104Q	chr16	89814984	89815216	9.027e-09	rs12929129
EpiGII3969104Q	chr16	89814984	89815216	2.867e-06	rs12928256
EpiGII3969104Q	chr16	89814984	89815216	1.584e-08	rs60828994
EpiGII3969104Q	chr16	89814984	89815216	2.416e-08	rs2238529
EpiGII3969104Q	chr16	89814984	89815216	1.607e-08	rs4785596
EpiGII3969104Q	chr16	89814984	89815216	1.714e-08	rs12709095
EpiGII3969104Q	chr16	89814984	89815216	1.396e-08	rs6500447,rs6500448
EpiGII3969104Q	chr16	89814984	89815216	2.304e-06	rs6500449
EpiGII3969104Q	chr16	89814984	89815216	1.7e-08	rs7200111
EpiGII3969104Q	chr16	89814984	89815216	1.737e-08	rs11076625
EpiGII3969104Q	chr16	89814984	89815216	2.553e-08	rs34665267
EpiGII3969104Q	chr16	89814984	89815216	2.552e-08	rs8044210
EpiGII3969104Q	chr16	89814984	89815216	1.262e-08	rs1057042
EpiGII3969104Q	chr16	89814984	89815216	1.268e-08	rs8049660
EpiGII3969104Q	chr16	89814984	89815216	1.264e-08	rs1800330
EpiGII3969104Q	chr16	89814984	89815216	2.335e-08	rs6500452
EpiGII3969104Q	chr16	89814984	89815216	1.171e-08	rs9928681
EpiGII3969104Q	chr16	89814984	89815216	4.893e-07	rs2159227
EpiGII3969104Q	chr16	89814984	89815216	1.183e-08	rs8051231
EpiGII3969104Q	chr16	89814984	89815216	3.652e-07	rs12924101
EpiGII3969104Q	chr16	89814984	89815216	1.205e-08	rs12709096
EpiGII3969104Q	chr16	89814984	89815216	1.34e-08	rs9933901
EpiGII3969104Q	chr16	89814984	89815216	2.221e-08	rs4785722
EpiGII3969104Q	chr16	89814984	89815216	5.936e-07	rs12599799
EpiGII3969104Q	chr16	89814984	89815216	8.653e-08	rs1558183
EpiGII3969104Q	chr16	89814984	89815216	1.551e-07	rs8055746
EpiGII3969104Q	chr16	89814984	89815216	1.208e-06	rs7205642
EpiGII3969104Q	chr16	89814984	89815216	3.654e-08	rs1079558
EpiGII3969104Q	chr16	89814984	89815216	1.152e-08	rs12922448
EpiGII3969104Q	chr16	89814984	89815216	4.116e-08	rs13331995
EpiGII3969104Q	chr16	89814984	89815216	6.368e-08	rs11076639
EpiGII3969104Q	chr16	89814984	89815216	1.033e-08	rs9745545
EpiGII3969104Q	chr16	89814984	89815216	1.03e-08	rs11076640
EpiGII3969104Q	chr16	89814984	89815216	1.365e-06	rs10775347
EpiGII4015783Q	chr17	73662899	73663153	1.408e-06	17-73294294
EpiGII4015783Q	chr17	73662899	73663153	2.193e-06	rs61757955
EpiGII4015783Q	chr17	73662899	73663153	1.376e-06	rs56298430
EpiGII4015783Q	chr17	73662899	73663153	1.384e-06	rs55771008
EpiGII4015783Q	chr17	73662899	73663153	3.699e-08	rs56150553
EpiGII4015783Q	chr17	73662899	73663153	4.772e-07	17-74005611
EpiGII4030066Q	chr17	80708128	80708322	2.691e-06	rs9914081
EpiGII4030066Q	chr17	80708128	80708322	2.234e-06	rs9898189
EpiGII4030066Q	chr17	80708128	80708322	1.61e-06	rs28794323
EpiGII4030066Q	chr17	80708128	80708322	1.466e-06	rs9894839
EpiGII4030066Q	chr17	80708128	80708322	1.627e-06	rs28640931
EpiGII4030066Q	chr17	80708128	80708322	1.654e-06	rs6502119
EpiGII4030066Q	chr17	80708128	80708322	1.707e-06	rs6650591
EpiGII4030066Q	chr17	80708128	80708322	2.153e-07	rs28455858
EpiGII4030067Q	chr17	80708321	80708551	2.756e-06	17-80479582
EpiGII4030067Q	chr17	80708321	80708551	1.009e-06	rs7207719
EpiGII4030067Q	chr17	80708321	80708551	1.133e-06	rs2246577
EpiGII4030067Q	chr17	80708321	80708551	6.995e-07	rs3748812
EpiGII4030067Q	chr17	80708321	80708551	1.539e-06	rs2243416,rs2459706
EpiGII4030067Q	chr17	80708321	80708551	2.605e-06	rs2451221
EpiGII4030067Q	chr17	80708321	80708551	1.532e-06	rs4789840
EpiGII4030067Q	chr17	80708321	80708551	1.568e-06	rs2451220
EpiGII4030067Q	chr17	80708321	80708551	1.524e-06	rs2248894
EpiGII4030067Q	chr17	80708321	80708551	2.203e-08	rs1056534
EpiGII4030067Q	chr17	80708321	80708551	1.765e-07	rs9891481
EpiGII4030067Q	chr17	80708321	80708551	2.233e-08	rs9907840
EpiGII4030067Q	chr17	80708321	80708551	2.044e-08	rs7217361
EpiGII4030067Q	chr17	80708321	80708551	8.816e-07	rs2248533
EpiGII4030067Q	chr17	80708321	80708551	1.993e-08	rs2264578
EpiGII4030067Q	chr17	80708321	80708551	1.884e-08	rs2459716,rs623209
EpiGII4030067Q	chr17	80708321	80708551	8.618e-07	rs2451215
EpiGII4030067Q	chr17	80708321	80708551	1.984e-08	rs2451214
EpiGII4030067Q	chr17	80708321	80708551	1.898e-08	rs689512
EpiGII4030067Q	chr17	80708321	80708551	8.583e-07	17-80716249
EpiGII4030067Q	chr17	80708321	80708551	8.505e-07	rs9912346
EpiGII4030067Q	chr17	80708321	80708551	8.619e-07	rs652265
EpiGII4030067Q	chr17	80708321	80708551	3.728e-08	rs11868810
EpiGII4030067Q	chr17	80708321	80708551	1.895e-08	rs2677913
EpiGII4030067Q	chr17	80708321	80708551	1.915e-08	rs2677914,rs11655811,rs3791172
EpiGII4030067Q	chr17	80708321	80708551	1.928e-08	rs7209753
EpiGII4030067Q	chr17	80708321	80708551	4.434e-08	rs7209909
EpiGII4030067Q	chr17	80708321	80708551	1.784e-08	rs583245,rs582192
EpiGII4030067Q	chr17	80708321	80708551	1.658e-07	rs589978
EpiGII4030067Q	chr17	80708321	80708551	4.829e-07	rs583164,rs590315
EpiGII4030067Q	chr17	80708321	80708551	8.398e-07	rs599314
EpiGII4030067Q	chr17	80708321	80708551	1.935e-08	rs8080925
EpiGII4030067Q	chr17	80708321	80708551	8.354e-07	rs586050
EpiGII4030067Q	chr17	80708321	80708551	1.897e-08	rs11078011,rs4986110
EpiGII4030067Q	chr17	80708321	80708551	8.521e-07	rs633811
EpiGII4030067Q	chr17	80708321	80708551	8.494e-07	rs603118
EpiGII4030067Q	chr17	80708321	80708551	1.943e-08	rs3791174
EpiGII4030067Q	chr17	80708321	80708551	1.88e-08	rs3744163
EpiGII4030067Q	chr17	80708321	80708551	1.818e-08	rs11650019
EpiGII4030067Q	chr17	80708321	80708551	7.554e-07	rs630945
EpiGII4030067Q	chr17	80708321	80708551	7.511e-07	rs665574
EpiGII4030067Q	chr17	80708321	80708551	1.734e-08	rs635996
EpiGII4030067Q	chr17	80708321	80708551	2.285e-08	rs35937711
EpiGII4030067Q	chr17	80708321	80708551	1.909e-08	rs629246,rs660007,rs8081416,rs8081423,rs8074430,rs12938126,rs12948179
EpiGII4030067Q	chr17	80708321	80708551	5.72e-08	rs11078012
EpiGII4030067Q	chr17	80708321	80708551	1.611e-07	rs11078013
EpiGII4030067Q	chr17	80708321	80708551	7.571e-07	rs658809
EpiGII4030067Q	chr17	80708321	80708551	1.853e-08	rs3791171
EpiGII4030067Q	chr17	80708321	80708551	2.748e-08	rs607939
EpiGII4030067Q	chr17	80708321	80708551	7.577e-07	rs610516
EpiGII4030067Q	chr17	80708321	80708551	1.863e-08	rs610944
EpiGII4030067Q	chr17	80708321	80708551	1.903e-08	rs687999,rs687980,rs12945348
EpiGII4030067Q	chr17	80708321	80708551	7.575e-07	rs655652
EpiGII4030067Q	chr17	80708321	80708551	1.782e-08	rs668990
EpiGII4030067Q	chr17	80708321	80708551	2.475e-08	rs2292972
EpiGII4030067Q	chr17	80708321	80708551	9.743e-07	rs590313
EpiGII4030067Q	chr17	80708321	80708551	1.503e-08	rs10445241
EpiGII4030067Q	chr17	80708321	80708551	7.038e-07	rs590255
EpiGII4030067Q	chr17	80708321	80708551	8.154e-07	rs606532
EpiGII4030067Q	chr17	80708321	80708551	1.794e-08	rs622789
EpiGII4030067Q	chr17	80708321	80708551	1.779e-08	rs11652941,rs12943788
EpiGII4030067Q	chr17	80708321	80708551	1.907e-08	rs4789718
EpiGII4030067Q	chr17	80708321	80708551	1.921e-08	rs6502133
EpiGII4030067Q	chr17	80708321	80708551	1.787e-08	rs10163502
EpiGII4030067Q	chr17	80708321	80708551	2.729e-08	rs11656410
EpiGII4030067Q	chr17	80708321	80708551	1.495e-08	rs2890159
EpiGII4030067Q	chr17	80708321	80708551	4.771e-08	rs4986116
EpiGII4030067Q	chr17	80708321	80708551	5.468e-08	rs4986117,rs8064531,rs4986119,rs12451922
EpiGII4030067Q	chr17	80708321	80708551	9.526e-08	rs12937095
EpiGII4030067Q	chr17	80708321	80708551	1.67e-08	rs60872639
EpiGII4030067Q	chr17	80708321	80708551	5.636e-07	rs733342
EpiGII4030067Q	chr17	80708321	80708551	5.301e-08	rs12946560
EpiGII4030067Q	chr17	80708321	80708551	5.252e-08	rs7209562
EpiGII4030067Q	chr17	80708321	80708551	5.267e-08	rs8075467
EpiGII4030067Q	chr17	80708321	80708551	1.338e-06	rs12945629
EpiGII4030067Q	chr17	80708321	80708551	4.477e-08	rs7222256
EpiGII4030067Q	chr17	80708321	80708551	5.823e-08	rs4986125
EpiGII4030067Q	chr17	80708321	80708551	5.072e-08	rs12936452
EpiGII4030067Q	chr17	80708321	80708551	5.057e-08	rs12938428
EpiGII4030067Q	chr17	80708321	80708551	4.916e-08	rs3744159
EpiGII4030067Q	chr17	80708321	80708551	5.025e-08	rs12937979
EpiGII4030067Q	chr17	80708321	80708551	5.002e-08	rs11658422
EpiGII4030067Q	chr17	80708321	80708551	4.981e-08	rs7218786
EpiGII4030067Q	chr17	80708321	80708551	3.073e-08	rs1317809
EpiGII4030067Q	chr17	80708321	80708551	3.357e-08	rs4986128
EpiGII4030067Q	chr17	80708321	80708551	6.378e-08	rs7221839
EpiGII4030067Q	chr17	80708321	80708551	9.928e-07	rs12938554
EpiGII4030067Q	chr17	80708321	80708551	4.615e-08	rs12938918
EpiGII4030067Q	chr17	80708321	80708551	4.869e-08	rs4986084
EpiGII4030067Q	chr17	80708321	80708551	5.931e-08	rs12936238
EpiGII4030067Q	chr17	80708321	80708551	4.834e-08	rs4986085
EpiGII4030067Q	chr17	80708321	80708551	2.592e-09	rs7215490
EpiGII4030067Q	chr17	80708321	80708551	2.587e-09	rs4986086
EpiGII4030067Q	chr17	80708321	80708551	2.525e-09	rs7208393
EpiGII4030067Q	chr17	80708321	80708551	4.736e-08	rs7212980
EpiGII4030067Q	chr17	80708321	80708551	7.756e-08	rs12938172
EpiGII4030067Q	chr17	80708321	80708551	4.906e-08	rs2085616
EpiGII4030067Q	chr17	80708321	80708551	9.379e-08	rs2271915
EpiGII4030067Q	chr17	80708321	80708551	5.276e-08	rs12941623
EpiGII4030067Q	chr17	80708321	80708551	5.368e-08	rs12936376
EpiGII4030067Q	chr17	80708321	80708551	3.328e-08	rs62076068
EpiGII4030067Q	chr17	80708321	80708551	3.864e-07	rs12949628
EpiGII4030067Q	chr17	80708321	80708551	1.382e-07	rs8080847
EpiGII4030067Q	chr17	80708321	80708551	7.769e-08	rs8067888
EpiGII4030067Q	chr17	80708321	80708551	2.572e-07	rs10163476
EpiGII4030067Q	chr17	80708321	80708551	2.706e-07	rs10163477
EpiGII4030067Q	chr17	80708321	80708551	2.258e-06	rs1127986
EpiGII4030067Q	chr17	80708321	80708551	6.422e-09	rs12949939
EpiGII4030067Q	chr17	80708321	80708551	3.659e-07	rs12942128
EpiGII4030067Q	chr17	80708321	80708551	2.302e-06	rs34077666
EpiGII4128245Q	chr17	48166519	48166861	7.239e-07	rs61541934
EpiGII4152050Q	chr17	55038512	55038633	3.349e-06	rs12601451
EpiGII4152050Q	chr17	55038512	55038633	3.283e-06	rs28872233
EpiGII4232497Q	chr18	3360822	3361029	6.102e-08	rs1628565,rs1629295
EpiGII4232497Q	chr18	3360822	3361029	6.058e-08	rs1791087
EpiGII4232497Q	chr18	3360822	3361029	2.149e-06	rs1632714
EpiGII4232497Q	chr18	3360822	3361029	3.226e-06	rs1662291
EpiGII4232497Q	chr18	3360822	3361029	4.538e-07	rs1662828
EpiGII4232497Q	chr18	3360822	3361029	1.931e-06	18-3342173
EpiGII4232497Q	chr18	3360822	3361029	3.055e-07	rs1626048
EpiGII4232497Q	chr18	3360822	3361029	1.245e-06	rs1791076
EpiGII4232497Q	chr18	3360822	3361029	4.162e-08	rs949304
EpiGII4266414Q	chr18	13241933	13242121	1.977e-07	rs7228009
EpiGII4266414Q	chr18	13241933	13242121	2.444e-09	rs9962328
EpiGII4266414Q	chr18	13241933	13242121	5.049e-08	rs12968182
EpiGII4266414Q	chr18	13241933	13242121	5.414e-10	rs4797744
EpiGII4266414Q	chr18	13241933	13242121	8.826e-09	rs12955200
EpiGII4266414Q	chr18	13241933	13242121	4.999e-10	18-13234212
EpiGII4266414Q	chr18	13241933	13242121	4.372e-10	rs9952107
EpiGII4266414Q	chr18	13241933	13242121	4.982e-10	rs9952186
EpiGII4266414Q	chr18	13241933	13242121	4.301e-10	rs9952516
EpiGII4266414Q	chr18	13241933	13242121	4.294e-10	rs9952649
EpiGII4266414Q	chr18	13241933	13242121	3.756e-10	rs9967502
EpiGII4266414Q	chr18	13241933	13242121	7.601e-10	rs9955376
EpiGII4266414Q	chr18	13241933	13242121	4.082e-10	rs9955747
EpiGII4266414Q	chr18	13241933	13242121	4.339e-10	rs9944928
EpiGII4266414Q	chr18	13241933	13242121	8.149e-10	rs9958724
EpiGII4266414Q	chr18	13241933	13242121	8.144e-10	rs4616353
EpiGII4266414Q	chr18	13241933	13242121	3.929e-10	rs6505789
EpiGII4266414Q	chr18	13241933	13242121	2.067e-10	rs7244519
EpiGII4266414Q	chr18	13241933	13242121	3.958e-10	rs12458598
EpiGII4266414Q	chr18	13241933	13242121	3.968e-10	rs12968748
EpiGII4266414Q	chr18	13241933	13242121	3.98e-10	rs4277409
EpiGII4266414Q	chr18	13241933	13242121	3.927e-10	rs3901403,rs4797747
EpiGII4266414Q	chr18	13241933	13242121	1.462e-07	18-13243626
EpiGII4266414Q	chr18	13241933	13242121	4.026e-10	rs4797749
EpiGII4266414Q	chr18	13241933	13242121	6.314e-09	rs4797750
EpiGII4266414Q	chr18	13241933	13242121	1.514e-07	rs4797752
EpiGII4266414Q	chr18	13241933	13242121	1.6e-07	rs4797753
EpiGII4279590Q	chr18	77713320	77713457	9.999e-07	rs7231668
EpiGII4279590Q	chr18	77713320	77713457	8.172e-07	rs35861047
EpiGII4279590Q	chr18	77713320	77713457	8.577e-07	rs35085469
EpiGII4279590Q	chr18	77713320	77713457	2.834e-06	18-77654529
EpiGII4279590Q	chr18	77713320	77713457	1.138e-08	18-77655325
EpiGII4279590Q	chr18	77713320	77713457	9.113e-09	rs34106166
EpiGII4279590Q	chr18	77713320	77713457	3.239e-09	rs35126219
EpiGII4279590Q	chr18	77713320	77713457	7.695e-08	rs9963023
EpiGII4279590Q	chr18	77713320	77713457	3.485e-09	rs35602283
EpiGII4279590Q	chr18	77713320	77713457	2.717e-07	rs35025619
EpiGII4279590Q	chr18	77713320	77713457	7.804e-09	rs12964996
EpiGII4279590Q	chr18	77713320	77713457	2.831e-07	18-77678240
EpiGII4279590Q	chr18	77713320	77713457	2.82e-09	18-77682908
EpiGII4279590Q	chr18	77713320	77713457	2.792e-09	rs12960918
EpiGII4279590Q	chr18	77713320	77713457	2.744e-09	rs34233686
EpiGII4279590Q	chr18	77713320	77713457	3e-09	rs12961784
EpiGII4279590Q	chr18	77713320	77713457	2.748e-09	rs34704161
EpiGII4279590Q	chr18	77713320	77713457	2.74e-09	rs34397434
EpiGII4279590Q	chr18	77713320	77713457	2.786e-09	18-77702150
EpiGII4279590Q	chr18	77713320	77713457	2.905e-09	rs8095510
EpiGII4279590Q	chr18	77713320	77713457	3.256e-09	rs12969321
EpiGII4279590Q	chr18	77713320	77713457	3.219e-09	18-77706207
EpiGII4279590Q	chr18	77713320	77713457	3.168e-09	rs12970432
EpiGII4279590Q	chr18	77713320	77713457	3.111e-09	rs12968195
EpiGII4279590Q	chr18	77713320	77713457	7.216e-08	rs35167189
EpiGII4279590Q	chr18	77713320	77713457	7.119e-08	18-77719701
EpiGII4279590Q	chr18	77713320	77713457	5.486e-08	18-77736579
EpiGII4279590Q	chr18	77713320	77713457	5.47e-08	18-77741240,18-77750473
EpiGII4279590Q	chr18	77713320	77713457	9.958e-08	18-77745224
EpiGII4279590Q	chr18	77713320	77713457	6.139e-08	18-77746891
EpiGII4279590Q	chr18	77713320	77713457	5.455e-08	rs60145418,18-77756379
EpiGII4279590Q	chr18	77713320	77713457	5.468e-08	18-77767489
EpiGII4279590Q	chr18	77713320	77713457	5.478e-08	18-77773620
EpiGII4279590Q	chr18	77713320	77713457	5.274e-08	18-77774648
EpiGII4279590Q	chr18	77713320	77713457	8.625e-08	18-77780718
EpiGII4279590Q	chr18	77713320	77713457	8.579e-08	rs9807401
EpiGII4279590Q	chr18	77713320	77713457	6.243e-08	rs57357293
EpiGII4279590Q	chr18	77713320	77713457	5.757e-08	18-77795026
EpiGII4279590Q	chr18	77713320	77713457	5.679e-08	18-77798177
EpiGII4279590Q	chr18	77713320	77713457	5.475e-08	18-77812745
EpiGII4279590Q	chr18	77713320	77713457	5.555e-08	18-77812799,rs59037580
EpiGII4279590Q	chr18	77713320	77713457	4.553e-08	18-77818718,18-77819539
EpiGII4279590Q	chr18	77713320	77713457	5.111e-08	rs12326299
EpiGII4279590Q	chr18	77713320	77713457	5.189e-08	18-77823685
EpiGII4279590Q	chr18	77713320	77713457	5.426e-08	18-77826272
EpiGII4279590Q	chr18	77713320	77713457	5.387e-08	18-77828991,18-77828992
EpiGII4279590Q	chr18	77713320	77713457	6.657e-08	18-77835924,18-77838545,rs28884018,18-77857195,18-77857546
EpiGII4279590Q	chr18	77713320	77713457	4.462e-08	18-77838977
EpiGII4279590Q	chr18	77713320	77713457	6.133e-08	rs13381391
EpiGII4279590Q	chr18	77713320	77713457	7.072e-07	rs4799144
EpiGII4279590Q	chr18	77713320	77713457	3.333e-07	18-77968940
EpiGII4279590Q	chr18	77713320	77713457	2.839e-07	rs8099569
EpiGII4369274Q	chr18	44087519	44087899	2.165e-07	rs11082532
EpiGII4369274Q	chr18	44087519	44087899	2.463e-08	rs12607120,rs1564130
EpiGII4369274Q	chr18	44087519	44087899	2.14e-06	rs4263029
EpiGII4369274Q	chr18	44087519	44087899	2.151e-06	rs1450425
EpiGII4369274Q	chr18	44087519	44087899	2.498e-08	rs7239183,rs4890668,rs7235681,rs1893566
EpiGII4369274Q	chr18	44087519	44087899	2.155e-06	rs10775482
EpiGII4369274Q	chr18	44087519	44087899	2.146e-06	rs2365336
EpiGII4369274Q	chr18	44087519	44087899	2.396e-06	rs9945092
EpiGII4369274Q	chr18	44087519	44087899	5.333e-07	rs8083018,rs8082780
EpiGII4369274Q	chr18	44087519	44087899	1.095e-08	rs4890331
EpiGII4369274Q	chr18	44087519	44087899	4.108e-08	rs9961324
EpiGII4369274Q	chr18	44087519	44087899	1.644e-07	rs4133965
EpiGII4424875Q	chr19	36024159	36024306	3.329e-06	rs1005948,rs8113518
EpiGII4424875Q	chr19	36024159	36024306	3.203e-07	rs2293690,rs11084815
EpiGII4424875Q	chr19	36024159	36024306	3.435e-07	rs1007567
EpiGII4424875Q	chr19	36024159	36024306	3.138e-07	rs12460886
EpiGII4424875Q	chr19	36024159	36024306	2.927e-07	rs12459329
EpiGII4424875Q	chr19	36024159	36024306	2.902e-07	rs12462401
EpiGII4424875Q	chr19	36024159	36024306	2.812e-06	rs2293697
EpiGII4424875Q	chr19	36024159	36024306	1.22e-07	rs11084816
EpiGII4424875Q	chr19	36024159	36024306	4.521e-11	rs7408798
EpiGII4424875Q	chr19	36024159	36024306	1.166e-10	rs7254211
EpiGII4424875Q	chr19	36024159	36024306	6.479e-11	rs6510495
EpiGII4424875Q	chr19	36024159	36024306	1.633e-16	rs6510498
EpiGII4424875Q	chr19	36024159	36024306	1.655e-16	rs1108549
EpiGII4424875Q	chr19	36024159	36024306	1.851e-16	rs3815018
EpiGII4424875Q	chr19	36024159	36024306	1.347e-16	19-36015727
EpiGII4424875Q	chr19	36024159	36024306	7.977e-15	rs2285512
EpiGII4424875Q	chr19	36024159	36024306	7.412e-17	rs35586120
EpiGII4424875Q	chr19	36024159	36024306	9.084e-14	rs12461911
EpiGII4424875Q	chr19	36024159	36024306	3.791e-10	rs56025317
EpiGII4424875Q	chr19	36024159	36024306	4.343e-10	rs4806171
EpiGII4424875Q	chr19	36024159	36024306	4.51e-10	rs34305005
EpiGII4424875Q	chr19	36024159	36024306	4.719e-10	rs34495996
EpiGII4424875Q	chr19	36024159	36024306	4.723e-17	19-36024296
EpiGII4424875Q	chr19	36024159	36024306	3.183e-07	rs4806174
EpiGII4424875Q	chr19	36024159	36024306	4.155e-09	rs55661438
EpiGII4424875Q	chr19	36024159	36024306	5.956e-10	rs2239945,rs759996
EpiGII4435517Q	chr19	39390520	39390885	1.48e-06	rs4310986
EpiGII4451171AG	chr19	44171583	44171876	4.408e-08	rs344787
EpiGII4451171AG	chr19	44171583	44171876	3.397e-08	rs344785
EpiGII4451171AG	chr19	44171583	44171876	4.447e-08	rs344784
EpiGII4451171AG	chr19	44171583	44171876	4.152e-08	rs344783
EpiGII4451171AG	chr19	44171583	44171876	4.385e-08	rs344782
EpiGII4451171AG	chr19	44171583	44171876	9.787e-07	rs344779
EpiGII4451171AG	chr19	44171583	44171876	6.856e-07	rs344772
EpiGII4451171AG	chr19	44171583	44171876	9.63e-07	rs344771
EpiGII4451171AG	chr19	44171583	44171876	3.125e-06	rs344770
EpiGII4451171AG	chr19	44171583	44171876	1.672e-06	rs10420393
EpiGII4452275Q	chr19	44489036	44489179	4.802e-07	rs17560331
EpiGII4452275Q	chr19	44489036	44489179	4.733e-07	19-44268270
EpiGII4484467Q	chr19	54802668	54803094	2.807e-07	rs443501
EpiGII4484467Q	chr19	54802668	54803094	4.438e-07	rs443874
EpiGII4484467Q	chr19	54802668	54803094	3.834e-07	rs452717
EpiGII4484467Q	chr19	54802668	54803094	1.675e-08	rs386056
EpiGII4484467Q	chr19	54802668	54803094	1.706e-08	rs383925
EpiGII4484467Q	chr19	54802668	54803094	3.795e-08	rs383369
EpiGII4484467Q	chr19	54802668	54803094	1.061e-08	rs448083
EpiGII4484467Q	chr19	54802668	54803094	1.028e-08	rs448092
EpiGII4484467Q	chr19	54802668	54803094	1.858e-09	rs62134988
EpiGII4484467Q	chr19	54802668	54803094	7.121e-09	rs397600
EpiGII4484467Q	chr19	54802668	54803094	1.329e-12	rs431420
EpiGII4484467Q	chr19	54802668	54803094	1.196e-12	rs386000
EpiGII4484467Q	chr19	54802668	54803094	1.194e-12	rs386003
EpiGII4484467Q	chr19	54802668	54803094	4.529e-11	rs398217
EpiGII4484467Q	chr19	54802668	54803094	4.566e-11	rs398227
EpiGII4484467Q	chr19	54802668	54803094	1.236e-12	rs798887
EpiGII4484467Q	chr19	54802668	54803094	3.735e-12	rs798889
EpiGII4484467Q	chr19	54802668	54803094	9.847e-12	rs57827784
EpiGII4484467Q	chr19	54802668	54803094	1.134e-10	rs56883673
EpiGII4484467Q	chr19	54802668	54803094	3.443e-12	rs798892
EpiGII4484467Q	chr19	54802668	54803094	7.211e-07	rs399657
EpiGII4484467Q	chr19	54802668	54803094	1.781e-13	rs61703366
EpiGII4484467Q	chr19	54802668	54803094	3.718e-13	rs798893
EpiGII4484467Q	chr19	54802668	54803094	2.725e-13	rs397558
EpiGII4484467Q	chr19	54802668	54803094	2.014e-13	rs419772
EpiGII4484467Q	chr19	54802668	54803094	1.84e-13	rs416867
EpiGII4484467Q	chr19	54802668	54803094	1.864e-12	rs384116
EpiGII4484467Q	chr19	54802668	54803094	2.473e-13	rs103294
EpiGII4484467Q	chr19	54802668	54803094	3.308e-12	rs380267
EpiGII4484467Q	chr19	54802668	54803094	9.173e-10	rs367070
EpiGII4484467Q	chr19	54802668	54803094	8.558e-08	rs1645788
EpiGII4484467Q	chr19	54802668	54803094	8.873e-09	rs434124
EpiGII4484467Q	chr19	54802668	54803094	8.952e-09	rs453755
EpiGII4507824Q	chr19	3975665	3975964	9.988e-07	rs41276860
EpiGII4507933Q	chr19	4012417	4012679	2.007e-06	rs350843
EpiGII4542582Q	chr19	16680992	16681330	2.201e-06	19-16869679
EpiGII4551985Q	chr19	19856063	19856202	1.646e-06	rs247759
EpiGII4551985Q	chr19	19856063	19856202	1.384e-06	rs247798
EpiGII4551985Q	chr19	19856063	19856202	1.608e-06	rs247796
EpiGII4642884Q	chr20	55502291	55502503	2.908e-06	rs4638857
EpiGII466643Q	chr2	157178044	157178306	2.235e-06	rs298288
EpiGII4848051Q	chr21	45173461	45173813	4.708e-07	rs56340987
EpiGII4848051Q	chr21	45173461	45173813	6.362e-07	21-45478835
EpiGII4848051Q	chr21	45173461	45173813	6.476e-07	rs2838475
EpiGII4848051Q	chr21	45173461	45173813	7.992e-07	rs3788100
EpiGII4848051Q	chr21	45173461	45173813	6.439e-07	21-45491933
EpiGII4848051Q	chr21	45173461	45173813	6.102e-07	rs55794203
EpiGII4848051Q	chr21	45173461	45173813	8.022e-07	rs2242949
EpiGII4848051Q	chr21	45173461	45173813	6.729e-07	21-45515550
EpiGII4880881Q	chr22	24379215	24379420	3.009e-06	rs2739329
EpiGII4880881Q	chr22	24379215	24379420	2.403e-06	rs12628821
EpiGII4880881Q	chr22	24379215	24379420	5.83e-07	rs9608229
EpiGII4880881Q	chr22	24379215	24379420	4.562e-07	rs5760175
EpiGII4880881Q	chr22	24379215	24379420	1.416e-06	rs35921388
EpiGII4880881Q	chr22	24379215	24379420	4.981e-07	rs5751792
EpiGII4880881Q	chr22	24379215	24379420	5.731e-07	rs5760176
EpiGII4880881Q	chr22	24379215	24379420	8.809e-07	rs2330721
EpiGII4880881Q	chr22	24379215	24379420	2.588e-06	rs17004811
EpiGII4904336Q	chr22	31364890	31365105	1.571e-09	rs55694472
EpiGII4904336Q	chr22	31364890	31365105	2.404e-08	22-31297158
EpiGII4904336Q	chr22	31364890	31365105	1.023e-09	22-31311544,22-31319187,22-31320508
EpiGII4904336Q	chr22	31364890	31365105	1.005e-09	22-31355992
EpiGII4904336Q	chr22	31364890	31365105	7.235e-09	22-31357929
EpiGII4904336Q	chr22	31364890	31365105	5.312e-09	22-31364993
EpiGII4904336Q	chr22	31364890	31365105	1.072e-09	22-31390228
EpiGII4925937Q	chr22	37875303	37875658	1.431e-07	rs5750478
EpiGII4925937Q	chr22	37875303	37875658	1.779e-07	rs4821690
EpiGII4925937Q	chr22	37875303	37875658	4.711e-07	rs5756787
EpiGII4925937Q	chr22	37875303	37875658	1.721e-07	rs5756790
EpiGII4925937Q	chr22	37875303	37875658	1.616e-07	rs4821694
EpiGII4925937Q	chr22	37875303	37875658	1.959e-07	rs4820300
EpiGII4925937Q	chr22	37875303	37875658	1.941e-07	rs4821697
EpiGII4925937Q	chr22	37875303	37875658	3.722e-07	rs2413478
EpiGII4925937Q	chr22	37875303	37875658	1.944e-07	rs9610838
EpiGII4925937Q	chr22	37875303	37875658	2.109e-07	rs739140
EpiGII4933437Q	chr22	40314259	40314500	3.116e-06	rs4820380
EpiGII4933437Q	chr22	40314259	40314500	3.171e-06	rs882564,rs882565
EpiGII4933437Q	chr22	40314259	40314500	3.177e-06	rs882566
EpiGII4933437Q	chr22	40314259	40314500	3.196e-06	rs5750844
EpiGII4933437Q	chr22	40314259	40314500	2.901e-06	rs1028321
EpiGII4933437Q	chr22	40314259	40314500	2.814e-06	rs5757703
EpiGII4939537Q	chr22	42180723	42180893	5.571e-07	rs132792
EpiGII4939537Q	chr22	42180723	42180893	5.619e-07	rs5758404,rs5758411
EpiGII4939537Q	chr22	42180723	42180893	5.499e-07	rs5758409
EpiGII4939537Q	chr22	42180723	42180893	7.083e-07	rs5758414
EpiGII4939537Q	chr22	42180723	42180893	5.214e-07	rs13054514
EpiGII4939537Q	chr22	42180723	42180893	4.355e-07	rs5758440
EpiGII4939537Q	chr22	42180723	42180893	5.176e-07	rs5758441,rs5758442
EpiGII4939537Q	chr22	42180723	42180893	2.856e-07	rs1883368
EpiGII4939537Q	chr22	42180723	42180893	5.391e-07	rs5758452
EpiGII4939537Q	chr22	42180723	42180893	5.357e-07	rs2050032
EpiGII4939537Q	chr22	42180723	42180893	5.31e-07	rs5751151
EpiGII4939537Q	chr22	42180723	42180893	5.51e-07	rs4401299
EpiGII4939537Q	chr22	42180723	42180893	5.6e-07	rs2064188
EpiGII4939537Q	chr22	42180723	42180893	5.484e-07	rs2413659
EpiGII4939537Q	chr22	42180723	42180893	2.663e-06	rs6519288
EpiGII4939537Q	chr22	42180723	42180893	5.299e-07	rs9623450
EpiGII4939537Q	chr22	42180723	42180893	5.349e-07	rs5751159
EpiGII4939537Q	chr22	42180723	42180893	2.642e-06	rs6002480
EpiGII4939537Q	chr22	42180723	42180893	5.303e-07	rs4822050,rs139559
EpiGII4939537Q	chr22	42180723	42180893	6.769e-07	rs139540
EpiGII4939537Q	chr22	42180723	42180893	5.329e-07	rs126092,rs139553
EpiGII4939537Q	chr22	42180723	42180893	1.947e-06	rs139569
EpiGII530184Q	chr2	175618003	175618266	8.908e-07	rs62175269
EpiGII530184Q	chr2	175618003	175618266	3.668e-07	rs7588365
EpiGII530184Q	chr2	175618003	175618266	2.936e-07	rs4972666
EpiGII5462001Q	chr2	20416905	20417113	2.223e-06	rs2230924
EpiGII5462001Q	chr2	20416905	20417113	7.623e-07	rs3771256
EpiGII5462001Q	chr2	20416905	20417113	6.316e-07	rs3732166
EpiGII5462001Q	chr2	20416905	20417113	6.572e-08	rs3771253
EpiGII5462001Q	chr2	20416905	20417113	1.231e-12	rs2015110
EpiGII5462001Q	chr2	20416905	20417113	9.64e-07	rs3821220
EpiGII5462001Q	chr2	20416905	20417113	2.653e-08	rs3771247
EpiGII5462001Q	chr2	20416905	20417113	1.749e-13	rs3821219
EpiGII5462001Q	chr2	20416905	20417113	4.452e-15	rs3771246
EpiGII5462001Q	chr2	20416905	20417113	5.838e-15	rs3771244
EpiGII5462001Q	chr2	20416905	20417113	7.254e-11	rs3771243
EpiGII5462001Q	chr2	20416905	20417113	1.776e-15	rs3771241
EpiGII5462001Q	chr2	20416905	20417113	4.872e-11	rs3771240
EpiGII5462001Q	chr2	20416905	20417113	1.148e-15	rs3771239
EpiGII5462001Q	chr2	20416905	20417113	2.506e-15	rs3732164
EpiGII5462001Q	chr2	20416905	20417113	2.706e-15	rs3732163
EpiGII5462001Q	chr2	20416905	20417113	4.715e-11	rs3732162
EpiGII5462001Q	chr2	20416905	20417113	3.26e-15	rs3771238
EpiGII5462001Q	chr2	20416905	20417113	3.241e-15	rs3771236
EpiGII5462001Q	chr2	20416905	20417113	3.311e-15	2-20415566
EpiGII5462001Q	chr2	20416905	20417113	7.231e-11	rs3771233
EpiGII5462001Q	chr2	20416905	20417113	5.512e-15	rs3755300
EpiGII5462001Q	chr2	20416905	20417113	5.1e-11	rs3771232
EpiGII5462001Q	chr2	20416905	20417113	1.678e-08	rs2007340
EpiGII5462001Q	chr2	20416905	20417113	3.891e-10	rs1106111
EpiGII5462001Q	chr2	20416905	20417113	4.426e-10	rs3771229
EpiGII5462001Q	chr2	20416905	20417113	4.485e-10	2-20420078
EpiGII5462001Q	chr2	20416905	20417113	3.868e-10	rs12464428
EpiGII5462001Q	chr2	20416905	20417113	5.72e-10	rs2002090
EpiGII5462001Q	chr2	20416905	20417113	1.27e-06	rs7558190
EpiGII5462001Q	chr2	20416905	20417113	1.266e-06	rs7585590
EpiGII5462001Q	chr2	20416905	20417113	1.841e-08	rs10495704
EpiGII5462001Q	chr2	20416905	20417113	5.797e-07	rs11096648
EpiGII5462001Q	chr2	20416905	20417113	6.527e-07	rs11096649
EpiGII5462001Q	chr2	20416905	20417113	3.364e-08	rs11096650
EpiGII5462001Q	chr2	20416905	20417113	3.203e-06	rs62109740
EpiGII5462001Q	chr2	20416905	20417113	2.928e-06	rs12373819
EpiGII5462001Q	chr2	20416905	20417113	2.953e-06	rs12373772
EpiGII5462001Q	chr2	20416905	20417113	1.086e-06	rs57938873
EpiGII5462001Q	chr2	20416905	20417113	1.546e-06	rs59129757
EpiGII5462001Q	chr2	20416905	20417113	1.564e-06	rs13415389
EpiGII5462001Q	chr2	20416905	20417113	1.526e-07	2-20433218
EpiGII5462001Q	chr2	20416905	20417113	2.054e-07	2-20434213
EpiGII5462001Q	chr2	20416905	20417113	4.283e-07	2-20437384
EpiGII5462001Q	chr2	20416905	20417113	4.543e-07	2-20437776
EpiGII5462001Q	chr2	20416905	20417113	4.81e-07	2-20437855
EpiGII5462001Q	chr2	20416905	20417113	2.359e-07	rs2072464
EpiGII5462001Q	chr2	20416905	20417113	2.984e-07	rs7595266
EpiGII5462001Q	chr2	20416905	20417113	2.054e-06	rs7563245
EpiGII5462001Q	chr2	20416905	20417113	3.138e-07	2-20442733
EpiGII571186Q	chr2	187454389	187454632	2.116e-06	2-187446311
EpiGII5814139Q	chr10	135175609	135175812	5.448e-08	rs3008338
EpiGII5814139Q	chr10	135175609	135175812	2.28e-06	rs12772276
EpiGII5814139Q	chr10	135175609	135175812	2.164e-06	rs34608857
EpiGII5814139Q	chr10	135175609	135175812	5.936e-07	rs34219763
EpiGII5814139Q	chr10	135175609	135175812	2.384e-07	rs34349355
EpiGII5913129Q	chr12	96309784	96309915	2.255e-16	rs7976481
EpiGII5913129Q	chr12	96309784	96309915	1.163e-15	rs9668340
EpiGII5913129Q	chr12	96309784	96309915	2.436e-16	rs11611425
EpiGII5913129Q	chr12	96309784	96309915	2.849e-16	rs11611877
EpiGII5913129Q	chr12	96309784	96309915	1.412e-09	rs10859980
EpiGII5913129Q	chr12	96309784	96309915	1.067e-15	rs10859981
EpiGII5913129Q	chr12	96309784	96309915	4.855e-15	rs11615470
EpiGII5913129Q	chr12	96309784	96309915	3.455e-14	12-96308696
EpiGII5913129Q	chr12	96309784	96309915	1.256e-15	12-96308723
EpiGII5913129Q	chr12	96309784	96309915	1.809e-15	rs11610070
EpiGII6020838Q	chr1	220393463	220393932	1.733e-06	rs10746396
EpiGII6020838Q	chr1	220393463	220393932	1.656e-08	rs41274790,1-220254613
EpiGII6020838Q	chr1	220393463	220393932	1.339e-08	rs41274794
EpiGII6020838Q	chr1	220393463	220393932	3.647e-07	rs2577152
EpiGII6020838Q	chr1	220393463	220393932	6.125e-09	1-220244229
EpiGII6020838Q	chr1	220393463	220393932	5.236e-09	1-220245292
EpiGII6020838Q	chr1	220393463	220393932	4.285e-09	1-220247714
EpiGII6020838Q	chr1	220393463	220393932	2.05e-09	1-220253635
EpiGII6020838Q	chr1	220393463	220393932	1.134e-07	1-220255488
EpiGII6020838Q	chr1	220393463	220393932	1.66e-09	1-220258802
EpiGII6020838Q	chr1	220393463	220393932	1.041e-08	1-220261312
EpiGII6020838Q	chr1	220393463	220393932	1.231e-09	1-220263384
EpiGII6020838Q	chr1	220393463	220393932	8.575e-09	1-220263461
EpiGII6020838Q	chr1	220393463	220393932	1.151e-09	1-220264450
EpiGII6020838Q	chr1	220393463	220393932	1.038e-09	1-220266968
EpiGII6020838Q	chr1	220393463	220393932	9.121e-10	1-220269800
EpiGII6020838Q	chr1	220393463	220393932	2.083e-06	1-220275170
EpiGII6020838Q	chr1	220393463	220393932	6.906e-10	1-220276423
EpiGII6020838Q	chr1	220393463	220393932	6.238e-10	1-220278626
EpiGII6020838Q	chr1	220393463	220393932	5.132e-10	1-220282512
EpiGII6020838Q	chr1	220393463	220393932	1.282e-09	1-220285817
EpiGII6020838Q	chr1	220393463	220393932	2.115e-10	1-220287026
EpiGII6020838Q	chr1	220393463	220393932	2.094e-10	1-220287350
EpiGII6020838Q	chr1	220393463	220393932	2.055e-10	1-220288100
EpiGII6020838Q	chr1	220393463	220393932	1.899e-10	1-220291713
EpiGII6020838Q	chr1	220393463	220393932	1.898e-10	1-220291859
EpiGII6020838Q	chr1	220393463	220393932	1.9e-10	1-220292036
EpiGII6020838Q	chr1	220393463	220393932	1.341e-06	1-220299111
EpiGII6020838Q	chr1	220393463	220393932	1.74e-10	1-220299677
EpiGII6020838Q	chr1	220393463	220393932	1.312e-06	rs2289191
EpiGII6020838Q	chr1	220393463	220393932	3.08e-10	1-220301011
EpiGII6020838Q	chr1	220393463	220393932	1.267e-10	1-220301148
EpiGII6020838Q	chr1	220393463	220393932	1.915e-10	1-220304024
EpiGII6020838Q	chr1	220393463	220393932	1.048e-08	1-220304974
EpiGII6020838Q	chr1	220393463	220393932	2.161e-10	1-220308701
EpiGII6020838Q	chr1	220393463	220393932	5.099e-07	rs59991104
EpiGII6020838Q	chr1	220393463	220393932	2.154e-10	1-220309045
EpiGII6020838Q	chr1	220393463	220393932	2.343e-06	1-220310347
EpiGII6020838Q	chr1	220393463	220393932	2.738e-10	1-220311958
EpiGII6020838Q	chr1	220393463	220393932	2.432e-10	rs12032345
EpiGII6020838Q	chr1	220393463	220393932	2.611e-10	1-220317958
EpiGII6020838Q	chr1	220393463	220393932	2.361e-06	1-220318522
EpiGII6020838Q	chr1	220393463	220393932	3.291e-10	1-220319007
EpiGII6020838Q	chr1	220393463	220393932	2.564e-10	rs1059140
EpiGII6020838Q	chr1	220393463	220393932	2.606e-10	rs11547779
EpiGII6020838Q	chr1	220393463	220393932	2.589e-10	rs2289189
EpiGII6020838Q	chr1	220393463	220393932	2.618e-10	rs3767655
EpiGII6020838Q	chr1	220393463	220393932	2.621e-10	1-220333301,1-220333817
EpiGII6020838Q	chr1	220393463	220393932	2.607e-10	1-220334650
EpiGII6020838Q	chr1	220393463	220393932	2.716e-10	1-220341504
EpiGII6020838Q	chr1	220393463	220393932	2.363e-08	rs41303055
EpiGII6020838Q	chr1	220393463	220393932	2.737e-10	1-220346976
EpiGII6020838Q	chr1	220393463	220393932	2.782e-10	1-220351700
EpiGII6020838Q	chr1	220393463	220393932	1.613e-06	rs11805285
EpiGII6020838Q	chr1	220393463	220393932	3.491e-10	1-220364850,1-220366100
EpiGII6020838Q	chr1	220393463	220393932	3.489e-10	1-220365975
EpiGII6020838Q	chr1	220393463	220393932	3.532e-10	1-220366497
EpiGII6020838Q	chr1	220393463	220393932	3.504e-10	1-220366946
EpiGII6020838Q	chr1	220393463	220393932	3.501e-10	1-220367060
EpiGII6020838Q	chr1	220393463	220393932	8.779e-07	1-220369037
EpiGII6020838Q	chr1	220393463	220393932	3.899e-10	1-220371704
EpiGII6020838Q	chr1	220393463	220393932	3.813e-10	1-220372549
EpiGII6020838Q	chr1	220393463	220393932	3.902e-10	1-220372797
EpiGII6020838Q	chr1	220393463	220393932	3.966e-10	1-220373013
EpiGII6020838Q	chr1	220393463	220393932	4.103e-10	1-220373857
EpiGII6020838Q	chr1	220393463	220393932	4.201e-10	1-220375460
EpiGII6020838Q	chr1	220393463	220393932	4.353e-10	1-220376951
EpiGII6020838Q	chr1	220393463	220393932	4.416e-10	1-220377891
EpiGII6020838Q	chr1	220393463	220393932	1.265e-09	1-220378491
EpiGII6020838Q	chr1	220393463	220393932	4.409e-10	1-220379741
EpiGII6020838Q	chr1	220393463	220393932	4.465e-10	1-220381127
EpiGII6020838Q	chr1	220393463	220393932	4.679e-10	1-220381458
EpiGII6020838Q	chr1	220393463	220393932	4.398e-10	1-220382973
EpiGII6020838Q	chr1	220393463	220393932	4.303e-10	1-220386707
EpiGII6020838Q	chr1	220393463	220393932	5.899e-10	1-220387605
EpiGII6020838Q	chr1	220393463	220393932	4.202e-10	1-220388990,1-220443012,1-220443164,1-220443593
EpiGII6020838Q	chr1	220393463	220393932	9.04e-09	1-220389471
EpiGII6020838Q	chr1	220393463	220393932	4.442e-10	1-220392201
EpiGII6020838Q	chr1	220393463	220393932	6.715e-10	1-220393359
EpiGII6020838Q	chr1	220393463	220393932	4.151e-10	1-220393514
EpiGII6020838Q	chr1	220393463	220393932	8.343e-07	1-220393580
EpiGII6020838Q	chr1	220393463	220393932	4.038e-10	1-220393607
EpiGII6020838Q	chr1	220393463	220393932	4.307e-10	1-220396772
EpiGII6020838Q	chr1	220393463	220393932	3.958e-10	1-220399442
EpiGII6020838Q	chr1	220393463	220393932	5.181e-10	1-220400999
EpiGII6020838Q	chr1	220393463	220393932	3.967e-10	1-220402331
EpiGII6020838Q	chr1	220393463	220393932	2.903e-08	1-220405709
EpiGII6020838Q	chr1	220393463	220393932	3.992e-10	1-220407136
EpiGII6020838Q	chr1	220393463	220393932	3.731e-09	1-220407626
EpiGII6020838Q	chr1	220393463	220393932	3.982e-10	1-220411141
EpiGII6020838Q	chr1	220393463	220393932	4.091e-10	1-220413134
EpiGII6020838Q	chr1	220393463	220393932	4.138e-10	1-220413838
EpiGII6020838Q	chr1	220393463	220393932	4.203e-10	1-220416872
EpiGII6020838Q	chr1	220393463	220393932	4.18e-10	1-220417911
EpiGII6020838Q	chr1	220393463	220393932	6.651e-10	1-220419345,1-220420802
EpiGII6020838Q	chr1	220393463	220393932	8.068e-09	1-220420981
EpiGII6020838Q	chr1	220393463	220393932	6.666e-10	1-220424835
EpiGII6020838Q	chr1	220393463	220393932	6.72e-10	1-220427144
EpiGII6020838Q	chr1	220393463	220393932	4.74e-09	1-220427839
EpiGII6020838Q	chr1	220393463	220393932	4.238e-10	1-220431360
EpiGII6020838Q	chr1	220393463	220393932	4.193e-10	1-220438505
EpiGII6020838Q	chr1	220393463	220393932	4.265e-10	1-220444533
EpiGII6020838Q	chr1	220393463	220393932	4.275e-10	1-220444753
EpiGII6020838Q	chr1	220393463	220393932	1.616e-06	1-220445076
EpiGII6020838Q	chr1	220393463	220393932	4.364e-10	rs2292418
EpiGII6020838Q	chr1	220393463	220393932	4.391e-10	1-220446207
EpiGII6040485Q	chr1	8929287	8929536	1.517e-12	rs2765507,rs2781064
EpiGII6040485Q	chr1	8929287	8929536	1.587e-12	rs4908519
EpiGII6040485Q	chr1	8929287	8929536	2.122e-12	rs61784221
EpiGII6040485Q	chr1	8929287	8929536	2.214e-12	rs1359591
EpiGII6040485Q	chr1	8929287	8929536	2.143e-12	rs7536304
EpiGII6040485Q	chr1	8929287	8929536	6.317e-12	rs11121248
EpiGII6040485Q	chr1	8929287	8929536	5.188e-07	rs12124592
EpiGII6040485Q	chr1	8929287	8929536	5.453e-07	rs12135673
EpiGII6040485Q	chr1	8929287	8929536	2.652e-07	rs11121256
EpiGII6040485Q	chr1	8929287	8929536	7.763e-07	rs1812348
EpiGII6040485Q	chr1	8929287	8929536	8.41e-07	rs10864369
EpiGII6040485Q	chr1	8929287	8929536	1.261e-06	rs7526401
EpiGII6040485Q	chr1	8929287	8929536	1.28e-06	rs7524131
EpiGII6040485Q	chr1	8929287	8929536	6.031e-07	rs7534552
EpiGII6040485Q	chr1	8929287	8929536	8.538e-07	rs6699210
EpiGII6040485Q	chr1	8929287	8929536	1.066e-06	rs6668049
EpiGII6040485Q	chr1	8929287	8929536	1.152e-06	rs6668426
EpiGII6054451Q	chr1	230312948	230313162	6.569e-07	rs636810
EpiGII6054451Q	chr1	230312948	230313162	4.17e-07	rs612577
EpiGII6056256AG	chr1	230848290	230848518	8.301e-08	1-231110901
EpiGII6056256AG	chr1	230848290	230848518	1.842e-07	1-231134798
EpiGII6056256AG	chr1	230848290	230848518	1.886e-07	1-231138373
[truncated: 903 more rows]
