# Supplementary material for: The Presence of Methylation Quantitative Trait Loci Indicates a Direct Genetic Influence on the Level of DNA Methylation in Adipose Tissue
Source: PLoS One. 2013 Feb 19;8(2):e55923. doi: 10.1371/journal.pone.0055923 (PMC3576415; doi:10.1371/journal.pone.0055923)
Supplement: Table S2 — All primary meQTL hits tested for replication. (XLS) [file pone.0055923.s004.xls]

## Sheet: Sheet1
Primary Study												Replication Study
DMH probe	Epigenomics ID	Chromosome	DMH Probe Start (b37)	DMH Probe End (b37)	SNP Position (b37)	SNP rsid	A1	A2	snp	s. e. (snp)	p-value	Illumina ID	CpG Position (b37)	snp	s. e. (snp)	one-sided p-value
44168	EpiGII8761308Q	1	53392620	53392784	53259897	rs6684837	C	T	-0.0713	0.0113	4.05e-07	cg27535305	53393297	0.0202592	0.00308012	2.39397e-11
50315	EpiGII9658371Q	1	153631080	153631351	153212859	rs1329101	T	C	0.0773	0.0133	1.623e-06	cg10272885	153630883	-0.000148567	0.000773576	0.423851
50344	EpiGII9659368Q	1	153939705	153940012	153773093	rs74545118	C	A	0.0226	0.029	0.4406	cg16029636	153940420	-9.13e-05	0.00112589	0.467685
106	EpiGII1035732Q	3	179040338	179040601	179247185	rs10513760	G	A	-0.3766	0.0634	1.156e-06	cg18576883	179041354	-0.000818234	0.00146247	0.712086
1770	EpiGII1423698Q	5	78281698	78281893	78282670	rs163125	G	A	0.1148	0.0181	3.522e-07	cg24893837	78282099	-0.0331603	0.00598639	1.51863e-08
2458	EpiGII1622451Q	6	166582675	166582968	166553633	rs6928596	A	G	-0.0627	0.0107	1.466e-06	cg17188046	166582197	-0.000194246	0.000859157	0.589434
6487	EpiGII2264054Q	7	133812100	133812441	133588739	rs6954700	G	A	0.0377	0.0058	1.916e-07	cg14706178	133811911	-2.04e-05	0.000542115	0.484991
42245	EpiGII8511477Q	10	88282242	88282433	88323401	rs2588282	C	T	-0.164	0.0285	1.954e-06	cg19596653	88281865	0.000381705	0.000946049	0.3433
9846	EpiGII3054918Q	10	30721783	30721962	30778184	rs103441	C	T	0.1489	0.0253	1.315e-06	cg03807314	30722678	0.000610394	0.00106978	0.715858
38637	EpiGII7924998Q	14	55907406	55907710	55906187	rs12888361	A	G	0.2443	0.0269	1.736e-10	cg16249711	55907007	0.00871309	0.00323818	0.996435
12795	EpiGII3619510Q	15	41625250	41625595	41632049	rs7183337	G	A	-0.258	0.0368	5.187e-08	cg11324740	41624793	-0.00124929	0.00233689	0.703535
14020	EpiGII3811572Q	16	8954289	8954493	8873576	rs45545237	C	G	-0.7017	0.0775	1.845e-10	cg04007936	8954017	0.0351888	0.00696353	2.17123e-07
16185	EpiGII4030067Q	17	80708321	80708551	80859844	rs7208393	G	A	0.1371	0.017	2.525e-09	cg27574244	80709357	-0.00181876	0.000776556	0.00958805
17792	EpiGII4152050Q	17	55038512	55038633	55130175	rs28872233	T	C	-0.2041	0.0365	3.283e-06	cg07844021	55038508	0.000201385	0.00306747	0.473828
20691	EpiGII4484467Q	19	54802668	54803094	54793721	rs61703366	G	A	0.2151	0.0181	1.781e-13	cg13733733	54803540	-0.010735	0.00576699	0.0313397
19615	EpiGII4435517Q	19	39390520	39390885	38912597	rs4310986	G	A	0.0587	0.01	1.48e-06	cg22814247	39389915	0.000723616	0.00100112	0.765101
19394	EpiGII4424875Q	19	36024159	36024306	36024296	rs74409639	G	A	-0.2649	0.0166	4.723e-17	cg25681177	36024439	0.0483807	0.00537065	2.68471e-19
19934	EpiGII4452275Q	19	44489036	44489179	44215450	rs76089163*	G	T	-0.2109	0.043	2.408e-05	cg27309253	44488327	0.00383065	0.00287557	0.091408
24853	EpiGII4904336Q	22	31364890	31365105	31355992	rs142563262	C	T	-0.2587	0.0307	1.005e-09	cg07894162	31364948	0.00203682	0.00181861	0.13136
*rs75575015 was used as a proxy for rs76089163 in the replication study (D'=1, r2=0.803, distance 52820 bp)
