# Supplementary material for: The Presence of Methylation Quantitative Trait Loci Indicates a Direct Genetic Influence on the Level of DNA Methylation in Adipose Tissue
Source: PLoS One. 2013 Feb 19;8(2):e55923. doi: 10.1371/journal.pone.0055923 (PMC3576415; doi:10.1371/journal.pone.0055923)
Supplement: Table S5 — Conditional analysis between top meQTL SNPs found in the primary and replication study. (XLS) [file pone.0055923.s007.xls]

## Sheet: Sheet1
			two-sided p-values in primary data				two-sided p-values In replication data				LD
DMH ID	Primary top meQTL (SNP1)	Replication top meQTL (SNP2)	SNP1	SNP1 cond SNP2	SNP2	SNP2 cond SNP1	SNP1	SNP1 cond SNP2	SNP2	SNP2 cond SNP1	distsance	r2	Dprime	CG-DMH disatance
EpiGII8761308Q	1-53259897	1-53392908	4.05e-07	0.0008069	2.764e-06	0.005691	1.65e-09	0.396132	4.66e-24	3.13e-16	133011	0.369	0.843	direct overlap
EpiGII1423698Q	5-78282670	5-78279013	3.522e-07	1	6.111e-07	1	1.41e-07	0.674272	3.07e-08	0.0716504	3657	0.887	1	206
EpiGII3811572Q	16-8873576	16-8951323	1.845e-10	2.19e-08	0.002977	0.4742	2.11e-06	0.0135981	1.42e-08	7.19e-05	77747	0.31	0.936	272
EpiGII4030067Q	17-80859844	17-80707827	2.525e-09	4.754e-06	1.532e-06	0.002819	0.0201341	0.471548	0.00205208	0.0315924	152017	0.231	0.595	-806
EpiGII4424875Q	19-36024296	same SNP	4.723e-17	same SNP	same SNP	same SNP	2.43e-14	same SNP	same SNP	same SNP	same SNP	same SNP	same SNP	-7
